# Supplementary material for: Integrin-based diffusion barrier separates membrane domains enabling the formation of microbiostatic frustrated phagosomes
Source: eLife. 2018 Mar 19;7:e34798. doi: 10.7554/eLife.34798 (PMC5897098; doi:10.7554/eLife.34798)
Supplement: Figure 2—source data 1. [file elife-34798-fig2-data1.xlsx]

## Sheet: Sheet1
Figure 2F		number of C. albicans hyphae per field
		internalized			actin cuff
		-EDTA	+EDTA		-EDTA	+EDTA
		5	6		4	1
		2	6		4	5
		7	9		8	3
		3	4		2	2
		1	5		1	9
		1	4		5	6
		6	6		9	3
		6	7		5	6
		7	4		9	2
		6	2		8	2
		5	3		8	2
		10	3		26	13
		7	3		7	9
		5	3		7	8
		6	4		5	4
		1	6		3	8
		3	12		9	10
		4	2		4	5
		6	0		7	6
		5	7		13	17
		6	1		11	9
		5	2		8	6
		4	1		10	12
		9	4		12	13
		7	6		13	8
		12	11		10	14
		7	1		10	11
		3	1		10	8
		9	4		7	11
		7	2		11	6
		3	5		10	9
		11	4		14	18
		8	8		10	30
		10	7		9	14
		4	5		14	12
		7	1		6	20
		3	9		6	11
		3	3		2	20
		4	1		10	12
		1	2		2	20
		1	0		4	5
		6	0		3	3
		2	2		2	2
		2	3		4	6
		2	0		4	1
		4	1		6	0
		1	0		6	3
		4	0		5	1
		2	1		3	1
		0	1		5	2
		0	1		1	5
		0	0		1	4
		5	0		1	8
		0	2		8	2
		0	3		7	4
			0			2
			1			1
			1			2
			2			7
			0			6
