# Supplementary material for: Integrin-based diffusion barrier separates membrane domains enabling the formation of microbiostatic frustrated phagosomes
Source: eLife. 2018 Mar 19;7:e34798. doi: 10.7554/eLife.34798 (PMC5897098; doi:10.7554/eLife.34798)
Supplement: Figure 3—source data 1. [file elife-34798-fig3-data1.xlsx]

## Sheet: Sheet1
Figure 3H		number of C. albicans hyphae per field
		internalized			actin cuff
		rat IgG2b	M1/70		rat IgG2b	M1/70
		2	5		2	0
		1	2		6	1
		6	6		1	2
		5	1		3	0
		2	3		1	0
		3	1		3	1
		0	5		12	0
		6	2		7	1
		1	1		3	0
		5	1		2	0
		3	1		5	1
		2	3		1	0
		7	3		4	0
		5	2		4	1
		5	2		1	2
		0	3		0	0
		4	5		4	1
		0	4		3	1
		2	3		7	1
		8	7		7	3
		2	4		5	1
		2	9		3	1
		8	4		2	1
		3	5		4	0
		5	7		3	1
		3	4		5	0
		6	0		6	1
		1	5		5	4
		4	2		8	2
		5	3		7	0
		9	5		10	0
		2	7		12	1
		11	5		4	0
		3	5		5	3
		5	6		8	0
		2	3		5	2
		8	2		5	1
		3	2		6	0
		7	7		6	0
		7	3		5	0
		6	6		5	2
		4	0		3	0
		7	9		8	2
		8	1		3	2
		4	5		6	0
		3	9		11	1
		7	6		14	1
		4	5		6	5
		7	5		8	1
		6	5		8	0
		0	8		0	1
		0	4		0	1
		0	6		0	1
		5	1		3	2
		7	4		7	1
		1	4		4	2
		8	5		6	0
		9	1		2	1
		5	2		5	1
		2	4		4	1
		7	1		6	1
		4	1		4	0
		3	6		5	0
		7	1		6	1
		3	3		7	2
		3	5		4	0
		7	4		5	2
		5	1		5	1
			4		2	1
