# Supplementary material for: Integrin-based diffusion barrier separates membrane domains enabling the formation of microbiostatic frustrated phagosomes
Source: eLife. 2018 Mar 19;7:e34798. doi: 10.7554/eLife.34798 (PMC5897098; doi:10.7554/eLife.34798)
Supplement: Figure 4—source data 1. [file elife-34798-fig4-data1.xlsx]

## Sheet: Sheet1
Figure 4A		number of C. albicans hyphae per field
		internalized						actin cuff
		RAW			RAW-Dectin1			RAW			RAW-Dectin1
		- serum	+ serum		- serum	+ serum		- serum	+ serum		- serum	+ serum
		1	2		2	2		0	5		8	4
		3	3		5	4		1	5		6	4
		3	4		2	4		2	4		9	11
		0	1		1	7		0	5		7	10
		1	7		4	6		1	6		7	8
		3	3		8	5		1	7		6	8
		0	6		7	5		0	6		9	8
		1	4		6	12		0	11		9	10
		1	7		7	1		1	5		11	3
		0	9		8	1		0	5		6	5
		1	3		6	3		0	5		7	6
		3	4		2	4		1	8		6	6
		2	4		7	5		0	7		6	7
		4	5		1			0	9		6
		2	1					1	10
		2
