# Supplementary material for: Integrin-based diffusion barrier separates membrane domains enabling the formation of microbiostatic frustrated phagosomes
Source: eLife. 2018 Mar 19;7:e34798. doi: 10.7554/eLife.34798 (PMC5897098; doi:10.7554/eLife.34798)
Supplement: Figure 4—source data 2. [file elife-34798-fig4-data2.xlsx]

## Sheet: Sheet1
Figure 4B		number of C. albicans hyphae per field
		internalized					actin cuff
		untreated	laminarin	laminarin post-adherance	mannan		untreated	laminarin	laminarin post-adherance	mannan
		2	2	1	3		7	3	9	9
		2	4	1	1		8	3	10	11
		3	1	3	1		7	4	7	9
		2	2	3	4		9	3	8	7
		4	1	4	2		12	2	9	10
		2	1	1	0		10	4	10	2
		2	0	4	1		11	4	9	12
		3	1	4	4		7	4	8	6
		3	2	1	1		6	3	5	3
		3	1	0	4		7	3	7	10
		4	2	3	1		4	2	8	4
		3	3	3	4		8	4	9	8
		4	0	4	3		6	3	9	10
		3	0	4	6		7	4	6	5
		3	1	4	3		4	3	3	3
		2					6
