# Supplementary material for: Integrin-based diffusion barrier separates membrane domains enabling the formation of microbiostatic frustrated phagosomes
Source: eLife. 2018 Mar 19;7:e34798. doi: 10.7554/eLife.34798 (PMC5897098; doi:10.7554/eLife.34798)
Supplement: Figure 4—source data 3. [file elife-34798-fig4-data3.xlsx]

## Sheet: Sheet1
Figure 4D		number of C. albicans hyphae per field
		internalized																	actin cuff
		tetO-CHT1/cht1Δ		tetO-MNT2/mnt2Δ		tetO-KRE1/kre1∆		tetO-KRE6/kre6∆		tetO-KRE62/kre62∆		tetO-ENG1/eng1∆		tetO-ACF2/acf2∆		tetO-BGL22/blg22∆			tetO-CHT1/cht1Δ		tetO-MNT2/mnt2Δ		tetO-KRE1/kre1∆		tetO-KRE6/kre6∆		tetO-KRE62/kre62∆		tetO-ENG1/eng1∆		tetO-ACF2/acf2∆		tetO-BGL22/blg22∆
		- DOX	+ DOX	- DOX	+ DOX	- DOX	+ DOX	- DOX	+ DOX	- DOX	+ DOX	- DOX	+ DOX	- DOX	+ DOX	- DOX	+ DOX		- DOX	+ DOX	- DOX	+ DOX	- DOX	+ DOX	- DOX	+ DOX	- DOX	+ DOX	- DOX	+ DOX	- DOX	+ DOX	- DOX	+ DOX
		8	3	2	4	7	10	4	4	8	4	6	4	5	2	9	1		21	12	12	11	7	11	14	9	11	14	10	8	11	9	14	15
		6	3	5	5	8	2	4	2	8	9	7	8	6	4	6	7		11	12	10	7	10	6	8	8	11	9	8	7	11	9	8	9
		7	9	3	2	8	3	7	5	5	15	8	8	5	2	5	8		10	17	7	9	5	13	9	7	8	17	10	12	10	9	6	5
		3	3	2	3	10	5	4	2	7	12	4	8	8	4	7	9		16	9	12	15	10	11	10	14	17	15	7	8	15	12	5	11
		5	7	2	3	4	10	11	2	10	8	3	6	8	2	6	8		13	9	15	19	5	9	13	3	6	10	4	8	7	13	13	5
		5	9	4	3	7	8	6	6	9	9	14	6	10	5	14	12		16	9	11	10	9	7	8	10	12	8	13	10	7	5	9	3
		8	6	8	13	7	13	6	5	6	6	8	10	4	7	10	13		11	7	9	13	4	5	5	12	8	8	11	11	9	9	2	8
		10	8	6	9	6	11	7	7	14	12	14	9	11	13	9	9		17	14	14	10	12	8	17	8	12	9	15	7	23	10	14	17
		8	8	13	7	3	4	10	11	9	11	8	12	5	11	6	12		15	15	19	12	9	7	9	7	10	9	6	10	8	12	8	14
		5	5	8	7	9	7	8	8	12	10	9	14	9	11	10	8		6	12	12	12	9	5	10	11	10	14	9	8	10	9	10	6
		8	8	12	8	12	8	9	14	10	13	10	9	3	11	6	9		11	11	15	13	6	4	8	14	5	9	4	6	8	16	7	9
		11	7	13	8	13	14	5	10	9	3	15	9	11	8	8	10		11	16	10	10	9	2	10	13	8	8	8	9	11	16	9	7
		6	9	6	13			6	7					6	3				10	7	16	35			10	15					11	9
		7	8	14	11			9	13					5	16				8	12	17	5			9	12					10	8
		5	9		10			7	8					8	12				7	10		8			7	5					8	9
			7		14			8	11					8	9					15		7			9	11					8	14
								7																	10
