# Supplementary material for: Integrin-based diffusion barrier separates membrane domains enabling the formation of microbiostatic frustrated phagosomes
Source: eLife. 2018 Mar 19;7:e34798. doi: 10.7554/eLife.34798 (PMC5897098; doi:10.7554/eLife.34798)
Supplement: Figure 4—source data 4. [file elife-34798-fig4-data4.xlsx]

## Sheet: Sheet1
Figure 4F		number of C. albicans hyphae per field
		internalized						actin cuff
		0 ng/mL	1.25 ng/mL	2.5 ng/mL	5 ng/mL	10 ng/mL		0 ng/mL	1.25 ng/mL	2.5 ng/mL	5 ng/mL	10 ng/mL
		3	2	1	8	3		10	5	11	1	1
		8	6	8	2	4		10	13	4	2	0
		7	3	1	9	4		12	11	7	5	0
		7	2	6	1	2		10	9	7	1	0
		5	3	4	3	4		16	11	5	2	0
		1	2	1	5	3		14	9	12	1	2
		4	2	6	2	3		16	9	8	0	1
		5	8	15	2	3		8	12	4	1	0
		7	2	2	2	5		7	10	9	0	1
		5	6	4	3	3		12	15	10	1	0
		4	10	5	3	2		12	11	7	1	1
		5	11	3	4	3		7	8	2	1	2
		5	4	4	2	4		8	10	4	1	0
		6	12	1	2	5		14	13	4	2	0
		5	6	3	4	1		10	11	9	4	1
		10	6	5	6	6		10	8	4	5	1
		12	14	4	1	7		8	9	3	1	1
		4	5	5	4	5		11	14	2	7	1
		6	6		5	3		11	14		0	0
		10	5		5	4		9	12		1	0
			6		2	3			9		4	1
			4		7	2			10		1	0
			6		4	2			11		0	1
			8		6	0			7		1	0
			5		2	5			11		0	1
					3						2
					2						0
					3						1
					1						1
					2						0
					5						0
