# Supplementary material for: Integrin-based diffusion barrier separates membrane domains enabling the formation of microbiostatic frustrated phagosomes
Source: eLife. 2018 Mar 19;7:e34798. doi: 10.7554/eLife.34798 (PMC5897098; doi:10.7554/eLife.34798)
Supplement: Figure 5—source data 1. [file elife-34798-fig5-data1.xlsx]

## Sheet: Sheet1
Figure 4E		number of C. albicans hyphae per field
		internalized					actin cuff
		untreated	PP2	piceatannol	PF573228		untreated	PP2	piceatannol	PF573228
		0	0	0	0		1	2	0	0
		0	0	0	1		2	1	0	0
		1	0	1	0		4	1	0	0
		1	2	2	2		3	1	0	0
		0	1	0	1		2	1	1	0
		0	2	1	0		1	5	2	0
		1	0	0	1		1	6	1	0
		0	1	1	0		2	4	1	2
		0	0	0	2		1	1	1	2
		1	0	1	0		3	2	0	2
		2	2	0	1		5	4	0	0
		1	0	1	1		7	3	0	0
		1		3	0		3		0	0
		1		0	1		1		3	2
		0		0	1		2		3	0
		1		1	0		1		0	0
				1	1				3	0
