# Supplementary material for: Integrin-based diffusion barrier separates membrane domains enabling the formation of microbiostatic frustrated phagosomes
Source: eLife. 2018 Mar 19;7:e34798. doi: 10.7554/eLife.34798 (PMC5897098; doi:10.7554/eLife.34798)
Supplement: Figure 5—source data 2. [file elife-34798-fig5-data2.xlsx]

## Sheet: Sheet1
Figure 4E		number of C. albicans hyphae per field
		internalized				actin cuff
		untreated	CK-666	SMI-FH2		untreated	CK-666	SMI-FH2
		0	0	0		1	2	0
		0	0	1		2	2	1
		1	1	0		4	6	0
		1	2	1		3	2	0
		0	0	0		2	3	0
		0	1	1		1	2	0
		1	0	0		1	6	0
		0	1	0		2	1	2
		0	0	1		1	2	1
		1	0	0		3	2	0
		2	2	0		5	2	1
		1	0	1		7	1	0
		1	2	0		3	3	0
		1	0	1		1	6	0
		0	0	0		2	1	0
		1	0	0		1	5	0
			0	3			1	0
			1	0			2	1
			0	2			1	1
			3	1			3	0
			3	0			1	2
			1	0			4	0
			0	1			2	0
			1	1			4	2
				0				0
				2				1
				0				2
				2				1
				0				1
				2				1
