# Supplementary material for: Integrin-based diffusion barrier separates membrane domains enabling the formation of microbiostatic frustrated phagosomes
Source: eLife. 2018 Mar 19;7:e34798. doi: 10.7554/eLife.34798 (PMC5897098; doi:10.7554/eLife.34798)
Supplement: Figure 7—source data 1. [file elife-34798-fig7-data1.xlsx]

## Sheet: Sheet1
Figure 7B		Fractional Recovery
	Time (sec)	Rab7(Q67L)																																												LAMP1
	0	0	0	0	0	0	0	0	0	0	0	0	0	0	0	0	0	0	0	0	0	0	0	0	0	0	0	0	0	0	0	0	0	0	0	0	0	0	0	0	0	0	0	0		0	0	0	0
	0.53	0.162793	-0.0322664	0.367947	-0.0042181	0.257091	0.296095	-0.158645	0.255121	0.0887548	0.38052	0.106045	0.24311	0.0277337	-0.0627734	0.473664	-0.0668572	0.151864	-0.0977664	-0.0978866	0.107919	-0.0184775	0.216306	0.192355	0.250258	1.00962	0.252822	0.0429052	0.0429052	0.0176185	0.162164	0.162164	-0.0131684	-0.031023	0.0433324	-0.047333	0.10573	0.10573	0.071214	0.0885561	0.0885561	0.0735254	0.0878551	0.352277		0.0124598	0.0151331	0.0233707	0.0542582
	1.07	0.242659	0.45007	0.343768	0.129857	0.604109	0.389622	0.101872	0.13015	0.171854	0.535494	0.0778557	0.305331	0.530385	0.652362	0.335411	0.409853	0.392524	0.359251	0.0625327	0.114655	0.360431	0.247598	0.368837	0.323143	0.542784	0.0021528	0.102915	0.102915	0.222184	0.252662	0.252662	0.157018	0.151468	0.142689	0.0749879	0.2736	0.2736	0.131636	0.131125	0.131125	0.194376	0.105501	0.263836		0.0219867	0.0578966	0.0319569	0.220425
	1.6	0.16898	0.47865	0.346598	0.208269	0.596708	0.456781	0.0994483	0.290326	0.230314	0.301616	0.318599	0.352149	0.42731	1.31857	0.774096	0.208939	0.433321	0.750458	0.253369	0.349356	0.477291	0.36893	0.316352	0.342899	0.679399	0.115968	0.147756	0.147756	0.194475	0.186545	0.186545	-0.0035694	0.141307	0.178028	0.198435	0.342378	0.342378	0.263851	0.191426	0.191426	0.0848091	0.122158	0.12887		0.051933	0.0451804	0.104765	-0.001911
	2.13	0.355542	0.414574	0.379981	0.309736	0.588628	0.62921	0.203855	0.441014	0.352166	0.281671	0.367384	0.368051	0.529057	0.904495	1.0323	0.289877	0.445265	0.535059	0.369523	0.462106	0.327284	0.124934	0.509295	0.297794	0.372702	0.0704402	0.184712	0.184712	0.228605	0.349144	0.349144	0.0634714	0.152293	0.190482	0.191257	0.298489	0.298489	0.26038	0.349294	0.349294	0.150406	0.283647	0.472382		0.0525538	0.0744182	0.065389	0.188114
	2.67	0.412385	0.377475	0.469607	0.430882	0.481098	0.546902	0.271774	0.408931	0.251825	0.52884	0.33903	0.382584	0.396004	0.86659	0.456612	0.29021	0.442018	0.49313	0.325893	0.478169	0.353094	0.43843	0.489535	0.387124	0.488466	0.315756	0.29186	0.29186	0.15788	0.274832	0.274832	0.246626	0.283722	0.257327	0.364109	0.34452	0.34452	0.279751	0.343405	0.343405	0.337724	0.409683	0.398006		0.0657603	0.088613	0.0994362	0.266759
	3.2	0.635289	0.40989	0.916115	0.486838	0.723913	0.482604	0.329448	0.491824	0.246485	0.57216	0.365763	0.439309	0.592391	1.10548	1.03427	0.379843	0.461879	0.349065	0.379577	0.428899	0.550801	0.529255	0.627301	0.406112	1.07722	0.114353	0.359857	0.359857	0.0608981	0.334794	0.334794	0.225714	0.287495	0.297589	0.329799	0.428679	0.428679	0.290491	0.271732	0.271732	0.202267	0.234182	0.459232		0.117137	0.11327	0.144093	0.238403
	3.73	0.472532	0.259371	0.794158	0.623195	0.611617	0.803311	0.277827	0.43027	0.499356	0.171181	0.261752	0.400074	0.728988	1.24703	0.796694	0.247666	0.638111	0.43868	0.426503	0.578336	0.621454	0.618079	0.684986	0.493252	0.857843	0.134629	0.281615	0.281615	0.0681501	0.442282	0.442282	0.291009	0.350153	0.386482	0.46467	0.510913	0.510913	0.33566	0.277882	0.277882	0.135527	0.288988	0.523715		0.117004	0.125913	0.194777	0.197971
	4.27	0.528199	0.484096	0.611365	0.493289	0.47695	0.578571	0.368306	0.290573	0.397827	0.380879	0.237525	0.524125	0.472133	1.16385	0.826742	0.164832	0.571419	0.950004	0.491341	0.689787	0.4289	0.477653	0.544214	0.506528	0.790435	0.317462	0.412338	0.412338	0.195113	0.341743	0.341743	0.208197	0.267796	0.449802	0.571204	0.485574	0.485574	0.357814	0.201544	0.201544	0.328609	0.483686	0.642491		0.149542	0.161957	0.212103	0.102349
	4.8	0.616175	0.575018	0.65095	0.730632	0.735392	0.583878	0.403214	0.942092	0.309007	0.205598	0.366818	0.527648	0.707269	1.50723	0.619833	0.403805	0.614289	0.821438	0.339727	0.796631	0.676972	0.420025	0.500603	0.505765	1.43587	0.281232	0.38257	0.38257	0.208954	0.494103	0.494103	0.340111	0.315272	0.502346	0.406907	0.466302	0.466302	0.290375	0.304676	0.304676	0.623656	0.427071	0.597824		0.232607	0.181178	0.213128	0.287517
	5.33	0.681516	0.625133	0.456627	0.70457	0.762418	0.70092	0.376605	0.940292	0.218736	0.23285	0.38502	0.436287	0.922178	1.43306	0.900596	0.297091	0.540386	1.79845	0.35915	0.719266	0.197962	0.927696	0.631411	0.469527	1.23302	0.0933398	0.45333	0.45333	0.235078	0.47927	0.47927	0.192566	0.307467	0.548855	0.533214	0.455342	0.455342	0.350625	0.40212	0.40212	0.409107	0.176931	0.570373		0.186307	0.197684	0.29084	0.44254
	5.87	0.600301	0.72146	0.799135	0.641179	0.489037	0.785882	0.624032	0.637135	0.654584	0.306129	0.411303	0.570458	0.73123	1.95267	0.654362	0.399261	0.709932	0.830922	0.398306	0.641218	0.318868	0.209032	0.651462	0.421929	0.709296	0.400882	0.374214	0.374214	0.157982	0.481811	0.481811	0.172584	0.339182	0.601626	0.496638	0.616913	0.616913	0.388233	0.261809	0.261809	0.411444	0.552184	0.566592		0.189663	0.185805	0.293158	0.251506
	6.4	0.686439	0.725199	0.669408	0.480793	0.886146	0.826051	0.449738	0.432354	0.648233	0.311416	0.373852	0.617229	0.388379	1.99505	0.72011	0.574855	0.610398	1.16309	0.704585	0.63378	0.426393	0.752521	0.543228	0.365036	1.01177	0.378236	0.492152	0.492152	0.31607	0.48726	0.48726	0.281334	0.402861	0.615809	0.750872	0.436005	0.436005	0.37108	0.399788	0.399788	0.482484	0.424247	0.83478		0.235726	0.197234	0.269359	0.366341
	6.93	0.707696	0.494756	0.814712	0.507362	0.437867	0.711306	0.615718	0.902455	0.466189	0.227971	0.530111	0.622811	0.903688	2.44138	0.681254	0.520142	0.624746	1.50636	0.562498	0.569511	0.436107	0.876173	0.75145	0.376657	1.28949	0.411507	0.447406	0.447406	0.221735	0.484979	0.484979	0.309757	0.335921	0.637448	0.328498	0.54308	0.54308	0.34706	0.382313	0.382313	0.352085	0.568793	0.420222		0.172748	0.242808	0.285155	0.534547
	7.46	0.771122	0.578909	0.697977	0.911914	0.777236	0.595633	0.565605	0.602982	0.3777	0.470619	0.305551	0.545443	1.02882	2.53261	0.755557	0.40523	0.558659	0.86936	0.643219	0.620479	0.521844	0.104129	0.634861	0.466504	0.890932	0.266044	0.512546	0.512546	0.359398	0.522062	0.522062	0.19307	0.366609	0.683937	0.922862	0.823326	0.823326	0.358177	0.370088	0.370088	0.364442	0.592518	0.605194		0.226846	0.246244	0.257559	0.282041
	8	0.744213	0.529478	0.851968	0.536444	0.62935	0.711781	0.578293	0.687311	0.614622	0.353312	0.300738	0.526482	0.591506	2.23303	0.719476	0.518373	0.660185	1.37075	0.550016	0.653512	0.434522	1.37601	0.658192	0.484888	0.824224	0.325423	0.568338	0.568338	0.232978	0.551195	0.551195	0.308611	0.376158	0.721607	0.527687	0.514953	0.514953	0.402206	0.345129	0.345129	0.53728	0.50522	0.731217		0.24496	0.242479	0.305169	0.393338
	8.53	0.901195	0.415609	0.606603	0.628038	0.601246	0.695082	0.401004	0.844378	0.289763	0.483539	0.34502	0.531696	0.747538	2.05282	0.827613	0.656721	0.603315	1.12992	0.549992	0.579696	0.392222	0.611904	0.564627	0.519573	0.753814	0.454281	0.546247	0.546247	0.294021	0.420904	0.420904	0.30812	0.494428	0.697269	0.716357	0.650123	0.650123	0.401075	0.49087	0.49087	0.453098	0.436416	0.636098		0.23953	0.25956	0.273607	0.355612
	9.06	0.721708	0.540991	0.648376	0.76922	0.443865	0.712465	0.652066	1.22696	0.280863	0.469484	0.329567	0.572005	0.937603	2.8029	0.584935	0.446937	0.527632	1.09346	0.652972	0.806076	0.264982	0.648149	0.690566	0.548618	1.46904	0.312362	0.504242	0.504242	0.379635	0.477708	0.477708	0.424374	0.365188	0.723627	0.723438	0.597578	0.597578	0.343816	0.46009	0.46009	0.378351	0.499759	0.468261		0.301253	0.270488	0.261974	0.436099
	9.6	0.818482	0.445488	1.02359	0.763598	0.875296	0.706792	0.477563	0.701649	0.327378	0.442015	0.295307	0.529482	1.09219	2.98085	0.643983	0.430093	0.633155	1.62661	0.496725	0.607041	0.254329	0.908	0.445265	0.677282	0.845981	0.130088	0.471168	0.471168	0.22451	0.553003	0.553003	0.294765	0.35067	0.801412	0.570677	0.688113	0.688113	0.480936	0.640534	0.640534	0.323697	0.427674	0.574835		0.309847	0.270123	0.31952	0.42783
	10.13	0.762414	0.687029	0.744541	0.616173	0.874842	0.744783	0.360035	1.05361	0.207308	0.357273	0.248446	0.496874	0.895563	3.40688	0.816306	0.519642	0.723722	1.20393	0.402122	0.680194	0.330897	0.196768	0.737952	0.620944	0.698154	0.277053	0.668472	0.668472	0.341853	0.435014	0.435014	0.389342	0.374054	0.619325	0.942993	0.771608	0.771608	0.396044	0.566375	0.566375	0.555288	0.470151	0.680527		0.28591	0.276051	0.243428	0.569465
	10.66	0.80041	0.579332	0.899252	0.823076	0.613353	0.748539	0.606297	0.79105	0.357353	0.459549	0.429161	0.495658	0.92199	2.29754	0.710402	0.722335	0.586852	1.41505	0.532219	0.6096	0.433555	1.07372	0.636107	0.782256	1.20551	0.57326	0.593679	0.593679	0.357172	0.464491	0.464491	0.343052	0.354706	0.935845	0.729393	0.78382	0.78382	0.413216	0.296103	0.296103	0.329505	0.457855	0.689252		0.255559	0.30434	0.331995	0.575768
	11.2	0.818905	0.550519	0.920177	0.930955	0.601923	0.824917	0.441968	0.986042	0.237738	0.682037	0.365834	0.625677	0.927485	2.41469	0.798044	0.665209	0.617741	1.44656	0.366111	0.619475	0.733717	0.738389	0.693786	0.826437	0.828533	0.487384	0.692824	0.692824	0.301092	0.405871	0.405871	0.234034	0.445587	0.849697	0.60666	0.78913	0.78913	0.406498	0.597151	0.597151	0.619367	0.522068	0.418164		0.32048	0.282577	0.300398	0.570698
	11.73	0.84293	0.779882	0.742238	0.787696	0.794356	0.668859	0.701872	1.25032	0.0462189	0.286395	0.359784	0.578815	0.981216	2.41671	0.721805	0.454842	0.625277	0.911018	0.467688	0.781324	0.690802	0.933578	0.69135	0.820762	0.564122	0.423015	0.620575	0.620575	0.292671	0.451773	0.451773	0.41357	0.395614	0.834104	0.494842	0.783469	0.783469	0.316987	0.561321	0.561321	0.432126	0.419446	0.56384		0.275725	0.300509	0.311764	0.523005
	12.26	0.819042	0.51336	0.906662	0.591978	0.877713	0.699959	0.615432	0.586704	0.347277	0.377748	0.380493	0.55993	0.904582	2.07907	0.515299	0.454708	0.723877	1.39611	0.36387	0.572535	0.463501	0.609842	0.571579	0.68552	1.62097	0.377201	0.643208	0.643208	0.378245	0.587036	0.587036	0.469347	0.470946	0.795748	0.589751	0.832764	0.832764	0.441087	0.551923	0.551923	0.625061	0.47943	0.68232		0.295746	0.299908	0.360712	0.573494
	12.8	0.806046	0.605854	0.933742	0.780147	0.871507	0.828242	0.578805	1.13606	0.361904	0.305964	0.524731	0.591092	0.692274	1.84559	0.666324	0.564177	0.697134	1.10986	0.614383	0.566032	0.542853	0.970881	0.620303	0.733785	1.29493	0.264863	0.570971	0.570971	0.351883	0.532037	0.532037	0.45039	0.421724	0.739567	0.585105	0.757218	0.757218	0.423241	0.543207	0.543207	0.498999	0.408679	0.374076		0.360748	0.296576	0.378934	0.531929
	13.33	0.848578	0.580717	0.831291	0.794338	0.891802	0.753889	0.629976	0.97022	0.492267	0.502543	0.429996	0.376196	0.751676	2.07928	0.494953	0.402414	0.638285	2.17657	0.493827	0.728774	0.710921	0.558207	0.847514	0.786674	1.29627	0.4096	0.576362	0.576362	0.541655	0.445125	0.445125	0.442533	0.480263	0.752482	0.689332	0.866216	0.866216	0.367933	0.51889	0.51889	0.305076	0.633463	0.399386		0.297587	0.323848	0.322399	0.589678
	13.86	0.850016	0.629948	1.04396	0.835366	1.02875	1.0308	0.370705	0.85941	0.395534	0.256609	0.476253	0.567293	0.772377	1.83008	0.396704	0.496655	0.607487	1.08536	0.52061	0.790662	0.814256	0.411916	0.688928	0.711911	1.19668	0.399594	0.544203	0.544203	0.428033	0.346042	0.346042	0.578074	0.505125	0.794488	1.01048	1.03546	1.03546	0.488132	0.522856	0.522856	0.542258	0.350846	0.764363		0.362534	0.315807	0.393261	0.578107
	14.4	0.91791	0.7397	0.771981	0.708639	0.802191	0.634512	0.710014	0.78763	0.408609	0.478913	0.317113	0.663759	0.857978	2.0023	0.25575	0.330555	0.628166	1.63732	0.567771	0.719855	0.623893	0.144997	0.753621	0.575486	1.67469	0.471418	0.654039	0.654039	0.411987	0.641554	0.641554	0.522154	0.487729	0.758391	0.941896	0.917875	0.917875	0.439752	0.587616	0.587616	0.67982	0.479388	0.534353		0.341421	0.314168	0.353579	0.697432
	14.93	0.679872	0.595928	0.98282	0.482889	1.19424	0.759394	0.699166	0.740122	0.0987866	0.519053	0.458805	0.396736	0.535779	2.45084	0.401047	0.356265	0.575433	0.980098	0.478271	0.918061	0.58813	1.29993	0.73223	0.668041	1.14745	0.204406	0.6581	0.6581	0.32766	0.423874	0.423874	0.416546	0.28074	0.666622	1.0212	0.740895	0.740895	0.44754	0.453382	0.453382	0.344971	0.591504	0.845969		0.386929	0.325937	0.387173	0.741878
	15.46	0.937515	0.676566	0.810456	0.798832	0.579374	0.537939	0.693906	0.670474	0.300844	0.465865	0.495565	0.410343	0.851183	2.63196	0.720514	0.419859	0.538611	2.33714	0.38646	0.767724	0.660325	0.686708	0.783303	0.565246	1.19765	0.505256	0.586174	0.586174	0.502225	0.482244	0.482244	0.429288	0.585833	0.811947	0.75555	0.919355	0.919355	0.411384	0.391092	0.391092	0.407825	0.583646	0.418636		0.345751	0.34699	0.395672	0.546493
	16	0.859629	0.69037	0.99349	0.656057	1.1131	0.853651	0.611015	1.11318	0.180598	0.402339	0.390772	0.526904	0.74969	2.31843	0.582179	0.654029	0.593703	1.26009	0.320611	0.618932	0.383657	0.368528	0.467501	0.599572	1.55261	0.565744	0.571795	0.571795	0.453449	0.542193	0.542193	0.361494	0.536183	0.75065	1.07092	0.734331	0.734331	0.480624	0.625704	0.625704	0.611822	0.699289	0.459199		0.379271	0.343985	0.429951	0.826241
	16.53	0.92084	0.806364	0.613252	0.541814	1.01854	0.378364	0.75167	1.07386	0.222547	0.732642	0.417135	0.402321	1.16716	1.90088	0.692828	0.737288	0.666656	1.04273	0.584586	0.607873	1.03992	0.241706	0.775424	0.803646	0.83229	0.566244	0.636849	0.636849	0.448663	0.30695	0.30695	0.475482	0.620575	0.604628	0.762119	0.975698	0.975698	0.453488	0.636919	0.636919	0.562299	0.442036	0.467342		0.354829	0.377508	0.350504	0.50562
	17.06	0.789421	0.637088	1.02897	0.675532	0.844378	0.633996	0.699269	0.975537	0.242957	0.550665	0.314065	0.369351	0.691409	1.78611	0.495334	0.501846	0.676712	1.8177	0.55769	0.61129	0.473265	0.889926	0.743735	0.639468	0.91253	0.439774	0.490225	0.490225	0.408952	0.365491	0.365491	0.488767	0.352654	0.773805	0.971151	0.870743	0.870743	0.478288	0.743079	0.743079	0.238284	0.613329	0.606743		0.371365	0.353738	0.457759	0.805516
	17.6	0.865872	0.624021	0.63321	0.66219	1.09943	0.634492	0.629381	0.541469	0.297013	0.543782	0.367623	0.389339	0.863666	2.70151	0.578042	0.637335	0.59456	1.27969	0.564178	0.71433	0.694797	1.01474	0.777726	0.676194	0.916374	0.46361	0.549789	0.549789	0.432569	0.510208	0.510208	0.436119	0.465488	0.874334	0.776944	0.935219	0.935219	0.479972	0.497439	0.497439	0.607413	0.604144	0.719578		0.378403	0.425294	0.377849	0.849375
	18.13	0.928441	0.54786	0.766992	0.485283	1.08374	0.728996	0.604792	1.08773	0.349398	0.539694	0.45538	0.379874	0.743628	1.72084	0.450178	0.365396	0.750105	2.06775	0.549031	0.570051	0.702597	0.369228	0.793243	0.774616	1.3172	0.450728	0.710887	0.710887	0.518349	0.54434	0.54434	0.450342	0.691043	0.766573	0.997617	0.842395	0.842395	0.603822	0.429171	0.429171	0.632431	0.636916	0.735807		0.381703	0.411571	0.451379	0.74205
	18.66	0.984194	0.546088	1.03249	0.390411	1.05555	0.610382	0.718098	0.803567	0.510358	0.622906	0.346055	0.508747	1.07171	1.36125	0.643101	0.475751	0.684878	1.8815	0.487492	0.676769	0.569881	0.701049	0.828618	0.722441	1.30488	0.672205	0.607462	0.607462	0.53667	0.440552	0.440552	0.476274	0.536281	0.707793	0.840605	0.908017	0.908017	0.481537	0.638383	0.638383	0.544557	0.584336	0.545378		0.431608	0.381833	0.444501	0.841645
	19.2	0.777871	0.746452	1.06981	0.62289	1.00603	0.638843	0.599088	1.18643	0.691787	0.78781	0.50621	0.430302	1.14965	1.75693	0.549089	0.581389	0.700512	1.8701	0.761531	0.764927	0.26414	0.450337	0.951216	0.729442	0.909973	0.15047	0.598272	0.598272	0.381468	0.548561	0.548561	0.559187	0.449833	0.761931	1.09889	1.01312	1.01312	0.444413	0.776367	0.776367	0.355009	0.615248	0.50888		0.349798	0.439059	0.428051	0.732307
	19.73	0.862727	0.608891	1.30203	0.704189	1.11222	0.867558	0.806774	0.613495	0.420171	0.650252	0.350105	0.525271	0.848934	1.54559	0.487568	0.513895	0.686352	2.00376	0.509846	0.662037	0.62008	1.564	0.735463	0.650093	0.740524	0.451958	0.522515	0.522515	0.601168	0.538805	0.538805	0.38817	0.491503	0.670384	0.918139	1.01053	1.01053	0.498505	0.786234	0.786234	0.440915	0.765807	0.586889		0.404313	0.431472	0.427336	0.665758
	20.26	0.880194	0.658839	0.8151	0.58887	1.07166	0.810879	0.509535	0.841342	0.122328	0.764453	0.246591	0.453023	0.790732	1.36058	0.609767	0.633069	0.666259	1.38621	0.456078	0.677959	0.838735	0.677881	0.782558	0.597125	0.657006	0.772568	0.749674	0.749674	0.664673	0.477169	0.477169	0.831442	0.612307	0.669441	1.14556	0.712247	0.712247	0.483273	0.644703	0.644703	0.628761	0.692414	1.0818		0.415195	0.389812	0.52914	0.797434
	20.8	0.818561	0.714575	1.07807	0.61384	1.06214	0.752268	0.757755	0.833457	0.0733347	0.509325	0.233427	0.53856	0.923336	1.91428	0.783371	0.616959	0.775233	1.35327	0.649259	0.543733	1.01258	1.10384	0.699538	0.644419	1.6133	0.629284	0.666621	0.666621	0.480371	0.597348	0.597348	0.600321	0.628401	0.911442	1.14825	0.746419	0.746419	0.450548	0.487418	0.487418	0.61146	0.7396	0.512623		0.39089	0.424727	0.405455	0.929216
	21.33	0.884815	0.614226	0.730096	0.806184	1.116	0.619363	0.713743	1.27141	0.354007	0.383286	0.504857	0.360698	0.815141	1.49653	0.899704	0.66137	0.73233	2.16707	0.600966	0.626777	0.864706	1.39472	0.697893	0.801754	0.525228	0.436615	0.568616	0.568616	0.704683	0.642222	0.642222	0.671926	0.516988	0.768002	1.28766	0.826083	0.826083	0.480378	0.769303	0.769303	0.376285	0.710741	0.619755		0.486655	0.443933	0.499803	0.881148
	21.86	0.901801	0.593537	1.03585	0.727834	0.966186	0.743081	0.686647	0.768508	0.15528	0.617124	0.399655	0.306837	0.696688	1.95283	0.528798	0.691292	0.719327	1.86784	0.571092	0.695854	0.45308	0.964668	0.732645	0.692671	1.03924	0.467091	0.719316	0.719316	0.615613	0.778295	0.778295	0.728999	0.544368	0.746409	0.700027	0.887059	0.887059	0.468249	0.755629	0.755629	0.533377	0.765542	0.481085		0.409579	0.455153	0.487584	0.7605
	22.4	0.937871	0.708619	0.878976	0.558112	1.23239	0.709941	0.753046	0.821093	0.333377	0.458172	0.404876	0.405353	0.876946	1.78153	0.706909	0.866455	0.472302	2.32927	0.494198	0.702098	0.578755	0.534006	0.957973	0.52566	0.603458	0.418147	0.697618	0.697618	0.586784	0.737776	0.737776	0.695108	0.472371	0.84981	0.947358	0.79354	0.79354	0.528174	0.863834	0.863834	0.511645	0.86239	0.530221		0.439121	0.476385	0.386039	0.718336
	22.93	0.853976	0.597576	0.718539	0.665949	1.15513	0.811263	0.92478	0.74529	0.0480217	0.76969	0.518633	0.327712	0.801552	0.858862	0.83005	0.744669	0.738352	1.99645	0.527571	0.629109	0.535282	0.685593	0.762584	0.699998	0.678669	0.371207	0.748535	0.748535	0.518284	0.683128	0.683128	0.588715	0.352594	1.039	1.12555	0.806099	0.806099	0.504729	0.534697	0.534697	0.48138	0.52941	0.684991		0.404736	0.450627	0.412691	0.933134
	23.46	0.914087	0.605939	1.24616	0.77621	1.06273	0.662149	0.575423	0.856939	0.274819	0.445883	0.40667	0.358644	0.712696	1.7796	0.185911	0.716098	0.644383	1.76858	0.478731	0.597554	1.05566	1.16885	0.855054	0.630892	0.303494	0.419608	0.649474	0.649474	0.386639	0.760622	0.760622	0.802737	0.498638	0.874881	1.39202	0.743363	0.743363	0.452686	0.771489	0.771489	0.306233	0.503341	0.61996		0.485409	0.392905	0.4787	0.871532
	24	1.15097	0.787042	1.20216	0.685678	1.36588	0.694335	0.754744	1.06777	0.206585	0.462653	0.414793	0.239378	0.803604	2.22628	0.525399	0.628231	0.82677	1.75283	0.485374	0.684983	1.1452	0.713636	1.00753	0.641697	0.656326	0.557402	0.778896	0.778896	0.793473	0.787288	0.787288	0.519859	0.449677	0.914584	0.985909	0.713118	0.713118	0.444499	0.743819	0.743819	0.46074	0.730545	0.497669		0.473981	0.459912	0.515181	0.755398
	24.53	0.825168	0.573139	0.972314	0.694622	1.37996	0.68727	0.760981	0.958642	0.11312	0.657564	0.32624	0.305068	0.92565	1.61589	0.585503	0.786931	0.642572	2.222	0.570821	0.597571	0.946717	0.836766	0.90756	0.716072	0.267103	0.581345	0.732453	0.732453	0.564184	0.713642	0.713642	0.683501	0.382602	0.886675	1.18346	0.747538	0.747538	0.374022	0.635133	0.635133	0.452762	0.708895	0.83394		0.413362	0.44268	0.550437	0.852027
	25.06	0.919767	0.737621	1.02462	0.786282	1.08688	0.863279	0.612341	0.567052	0.352286	0.678898	0.343011	0.267107	0.814605	2.37482	0.425265	0.63664	0.692339	1.51563	0.598727	0.587804	0.758299	0.840494	0.934121	0.709121	0.276413	0.599521	0.777419	0.777419	0.417475	0.766564	0.766564	0.555275	0.486214	0.856758	1.08888	0.831611	0.831611	0.4955	0.77101	0.77101	0.346504	0.568389	0.779319		0.450865	0.478107	0.535634	1.0066
	25.59	0.882312	0.806612	0.805943	0.860187	0.965939	0.812621	0.805022	0.87895	0.0334797	0.610718	0.378192	0.254979	1.1769	1.71032	0.387686	0.747283	0.611246	3.08968	0.372852	0.68483	0.475412	0.797646	0.916345	0.759679	0.509255	0.799577	0.713532	0.713532	0.559354	0.775443	0.775443	0.74524	0.481984	0.975136	1.35701	0.81838	0.81838	0.540593	0.759663	0.759663	0.511544	0.745152	0.958703		0.462628	0.435818	0.574951	0.915297
	26.13	0.896691	0.489831	0.744763	0.852707	0.861666	0.743961	0.749405	0.860571	0.172652	0.447321	0.53535	0.196838	0.952202	1.97584	0.259832	0.642159	0.716133	1.98342	0.405337	0.748438	0.449558	0.868901	0.765765	0.671434	0.406753	0.590076	0.701746	0.701746	0.572388	0.723112	0.723112	0.554573	0.291441	1.03857	1.25578	0.914175	0.914175	0.473065	0.761815	0.761815	0.419454	0.745067	0.96106		0.431236	0.461753	0.545039	0.941067
	26.66	0.984204	0.50693	0.869647	0.648225	0.968152	0.845886	0.7953	1.02862	0.289657	0.715185	0.340525	0.25558	0.815262	1.70825	0.572272	0.729793	0.532553	1.78721	0.57425	0.759481	0.799382	0.376159	0.876245	0.633989	0.657627	0.773267	0.676859	0.676859	0.40554	0.833071	0.833071	0.590197	0.489648	0.946506	0.927868	0.802502	0.802502	0.48218	0.901491	0.901491	0.4875	0.612344	0.765366		0.436617	0.450062	0.537146	0.815253
	27.19	0.959276	0.648269	0.900852	0.621274	0.882149	0.768022	0.830916	0.58798	0.181387	0.477828	0.193807	0.284377	0.805316	1.31468	0.344876	0.67777	0.700446	1.83614	0.43956	0.62275	0.826793	0.745113	0.819564	0.524409	0.180461	0.665396	0.667482	0.667482	0.480476	0.866504	0.866504	0.526649	0.51222	0.964505	0.985473	0.792943	0.792943	0.562714	0.723695	0.723695	0.568383	0.689948	0.500971		0.462946	0.499689	0.523631	0.956272
	27.73	1.05179	0.463483	1.15639	0.867249	1.29655	0.705284	0.837637	0.636413	0.225505	0.7945	0.424683	0.426182	1.0389	1.90982	0.209153	0.693485	0.686545	1.54271	0.557559	0.719018	0.653181	0.43854	0.967256	0.710558	0.0628289	0.729653	0.692343	0.692343	0.547813	0.761572	0.761572	0.663064	0.350886	0.897174	1.3509	1.05924	1.05924	0.432966	0.741773	0.741773	0.737236	0.686316	0.729601		0.496249	0.495811	0.557347	0.863487
	28.26	0.910122	0.548756	0.906282	0.745568	0.890409	0.603478	0.653709	0.996278	0.134616	0.605645	0.451563	0.249796	1.03686	1.66996	0.502621	0.676402	0.778149	1.8175	0.335766	0.682906	0.469882	0.369529	0.87509	0.723834	0.0802595	0.394741	0.867539	0.867539	0.568136	0.595241	0.595241	0.62863	0.350701	0.913923	1.24059	1.12129	1.12129	0.566384	0.755878	0.755878	0.366089	1.01156	0.597727		0.442166	0.501383	0.598655	1.00511
	28.79	0.918141	0.715925	0.908216	0.730746	1.20754	0.799518	0.717015	0.654405	0.220596	0.679374	0.334384	0.318221	0.951181	1.27624	0.390393	0.77372	0.627802	1.63696	0.616913	0.704724	0.50647	0.978685	0.793452	0.604976	0.417396	1.04271	0.651757	0.651757	0.762653	0.521742	0.521742	0.618665	0.508894	0.845917	0.902854	0.797659	0.797659	0.548145	0.796534	0.796534	0.503614	0.738496	0.872928		0.461737	0.492383	0.604927	0.909036
	29.33	0.953241	0.41167	1.00513	0.55818	0.98044	0.612857	0.695634	0.789666	-0.0546596	0.427631	0.55256	0.387058	0.768887	1.29089	0.501701	0.464503	0.668983	1.77602	0.675953	0.690834	0.823379	0.50125	0.814163	0.638524	-0.0534287	0.744252	0.747591	0.747591	0.657987	0.747852	0.747852	0.444642	0.460007	0.864205	0.842061	0.727206	0.727206	0.51111	0.964037	0.964037	0.326144	0.732929	0.685666		0.443875	0.547515	0.532644	1.04889
	29.86	0.898214	0.592456	0.847727	0.868157	0.759787	0.630006	0.837088	0.854747	0.12087	0.412904	0.575031	0.264916	0.877457	1.54153	0.603771	0.918425	0.736228	1.97035	0.544722	0.598395	0.552745	0.733652	0.7327	0.702024	0.243382	0.452414	0.854507	0.854507	0.515366	0.773947	0.773947	0.497106	0.667174	0.944519	1.06251	0.626456	0.626456	0.40929	0.910049	0.910049	0.652945	1.07207	0.970037		0.503646	0.450224	0.646513	0.90633
	30.39	0.803414	0.669209	0.935496	0.622149	1.3334	0.797389	0.775718	0.992515	0.080415	0.499993	0.480086	0.255798	0.980938	2.18063	0.681956	0.518765	0.78904	1.69142	0.436414	0.611365	1.01047	0.982588	0.815069	0.685531	0.789044	0.396123	0.77119	0.77119	0.799217	0.577187	0.577187	0.737366	0.61256	0.830845	1.11089	0.925397	0.925397	0.464926	0.893487	0.893487	0.353643	0.786217	0.844157		0.469944	0.454538	0.646905	0.847702
	30.93	0.882605	0.615614	1.0841	0.764949	1.07236	0.820071	0.813722	0.530816	0.385323	0.536526	0.64073	0.275478	1.20432	1.82117	0.63507	0.830605	0.64107	1.69109	0.327005	0.493109	0.688179	0.948253	0.762013	0.636356	-0.182859	0.430855	0.776729	0.776729	0.663863	0.708043	0.708043	0.61632	0.37011	0.858019	0.868364	0.93802	0.93802	0.492666	0.805921	0.805921	0.48087	0.953247	0.580581		0.516899	0.478401	0.61804	1.06457
	31.46	0.842433	0.431235	0.984899	0.677958	1.03714	0.869193	0.893666	0.416793	0.035968	0.612348	0.335234	0.256914	1.02081	1.54153	0.402924	0.517715	0.622955	1.97158	0.520432	0.602649	0.850904	1.03292	0.679194	0.632676	-0.142778	0.238973	0.785564	0.785564	0.712525	0.804767	0.804767	0.637105	0.301682	0.795009	1.11101	0.559288	0.559288	0.500711	0.834209	0.834209	0.318207	0.586463	0.506493		0.498357	0.471868	0.638724	0.957734
	31.99	0.824787	0.432907	1.22466	0.920496	1.15199	0.847222	0.984521	0.667678	0.020758	0.526663	0.675005	0.354185	1.2373	2.00563	0.543409	0.595656	0.788133	2.88731	0.335695	0.52083	0.813405	0.369272	0.840403	0.652733	-0.0419545	0.543287	0.741257	0.741257	0.639004	0.704186	0.704186	0.556138	0.460091	0.99793	0.986549	0.957442	0.957442	0.489591	0.785528	0.785528	0.51262	0.740765	0.905464		0.449593	0.484943	0.659387	0.776173
	32.53	0.782941	0.453093	0.928718	0.655898	1.19666	1.00059	0.812037	0.69521	-0.0046188	0.492593	0.305865	0.190325	1.18151	1.5859	0.523763	0.432881	0.850321	2.21969	0.64389	0.52452	0.726694	1.2252	0.806752	0.644255	0.203494	0.461571	0.697552	0.697552	0.660889	0.71582	0.71582	0.391503	0.537951	0.863948	1.03462	0.924819	0.924819	0.516691	0.811391	0.811391	0.415119	0.865219	0.785212		0.52544	0.405894	0.60311	0.859998
	33.06	0.962455	0.318309	1.05257	0.628115	0.875976	0.733416	0.890796	0.855395	0.190557	0.419678	0.453343	0.370352	1.0058	2.30444	0.795706	0.727275	0.698825	2.19913	0.657089	0.719226	0.832341	0.922249	0.89305	0.59221	-0.111565	0.990461	0.702571	0.702571	0.604462	0.701326	0.701326	0.611617	0.617316	0.684562	0.883583	0.922162	0.922162	0.416888	0.894969	0.894969	0.608863	0.965044	0.440286		0.453489	0.458607	0.674426	1.01362
	33.59	0.935138	0.428955	1.1004	0.715924	1.32248	0.903406	0.750434	0.76471	0.340587	0.43916	0.557422	0.386209	1.11667	1.59534	0.839004	0.696384	0.624838	2.63081	0.771707	0.747521	0.937528	1.38719	0.693391	0.64295	0.140416	0.489525	0.713653	0.713653	0.592461	0.625692	0.625692	0.598677	0.741255	0.904346	1.2347	1.06024	1.06024	0.448306	1.07012	1.07012	0.631147	1.12321	0.779826		0.477161	0.423066	0.631829	1.06393
	34.13	0.848963	0.608268	1.14531	0.718735	1.19063	0.822322	0.947968	0.819411	0.18083	0.593699	0.531648	0.282744	0.698553	1.61362	0.717599	0.6404	0.808987	2.35018	0.460464	0.567953	0.87447	0.806813	0.913106	0.694602	0.317855	1.01792	0.789307	0.789307	0.618901	0.863753	0.863753	0.475603	0.356607	0.793986	1.26842	0.898576	0.898576	0.465158	0.706747	0.706747	0.369703	1.08513	0.670588		0.428878	0.462199	0.631624	0.837648
	34.66	0.816705	0.358668	0.952485	0.644421	1.35005	0.910852	0.729695	0.924722	0.0625585	0.544426	0.491318	0.403768	1.24928	1.60053	0.637039	0.39362	0.663331	1.93789	0.501795	0.63318	0.778432	0.651833	0.783924	0.459993	-0.0207812	0.886977	0.629504	0.629504	0.761272	0.828961	0.828961	0.520317	0.665396	0.782103	1.09526	1.00951	1.00951	0.454369	0.624326	0.624326	0.365196	0.582984	0.634365		0.431771	0.502618	0.67006	0.999843
	35.19	0.770856	0.375954	0.735962	0.706901	0.862241	0.595426	0.754656	0.856452	-0.117972	0.7398	0.506175	0.347891	1.16393	1.24272	0.800142	0.457653	0.738299	1.75776	0.342379	0.753032	0.877694	1.03439	0.874512	0.547003	-0.317793	0.722708	0.880398	0.880398	0.605886	0.819897	0.819897	0.668179	0.664218	0.835804	0.959133	0.970905	0.970905	0.479521	0.755622	0.755622	0.514021	0.762326	1.08725		0.456852	0.484089	0.659932	0.958429
	35.73	0.811727	0.397506	0.955476	0.736567	1.28145	1.00801	0.908422	1.08628	-0.0427172	0.471001	0.482222	0.275751	1.11384	2.0452	0.927513	0.688046	0.869871	1.98004	0.283781	0.801901	0.887434	1.72216	0.830501	0.657515	-0.116029	0.717964	0.691776	0.691776	0.869205	0.564218	0.564218	0.348022	0.558624	0.732666	0.989479	1.02839	1.02839	0.51844	1.02984	1.02984	0.306546	0.850936	0.64803		0.471253	0.49055	0.685809	1.0508
	36.26	0.866589	0.605253	1.14537	0.744827	0.798557	0.976421	0.754714	1.04492	-0.02198	0.705352	0.727012	0.207633	1.19082	1.72738	0.769132	0.694157	0.789041	1.37416	0.139309	0.752164	1.01457	0.627475	0.785093	0.714431	-0.175449	0.735057	0.683483	0.683483	0.633048	0.78692	0.78692	0.600027	0.482658	0.806537	1.04191	1.27467	1.27467	0.329971	0.733857	0.733857	0.411709	0.764152	0.498401		0.409099	0.460635	0.654632	0.928893
	36.79	0.900576	0.511152	1.09612	0.70752	1.09979	0.740878	0.664574	0.624287	0.0374307	0.498182	0.499124	0.240671	1.1374	1.69641	0.33341	0.567234	0.815161	2.03387	0.276158	0.830688	1.2115	0.894427	0.962965	0.539747	0.553319	0.959806	0.813746	0.813746	0.523638	0.525481	0.525481	0.421731	0.378272	0.893036	1.24516	1.11864	1.11864	0.494433	0.778535	0.778535	0.514779	0.697724	0.488808		0.533395	0.550507	0.634772	1.0718
	37.33	0.708686	0.272241	0.681293	0.744901	0.96542	0.909853	0.587749	0.922288	0.35208	0.394581	0.58673	0.247114	0.903082	2.22289	0.595718	0.639726	0.602341	1.76288	0.414295	0.775272	0.990209	0.672815	0.774095	0.281989	-0.13162	0.848817	0.884298	0.884298	0.566433	0.763872	0.763872	0.305637	0.382617	0.798143	1.22877	1.10294	1.10294	0.382962	0.82994	0.82994	0.240826	0.781151	0.797595		0.432892	0.543192	0.64132	1.03017
	37.86	0.808193	0.183117	1.07681	0.766967	1.38032	0.871006	0.950149	1.04054	0.149603	0.538602	0.604854	0.283782	1.15983	2.04456	0.780767	0.640737	0.785165	2.67615	0.299534	0.724666	1.04683	0.36295	0.91876	0.412907	0.190279	1.018	0.670882	0.670882	0.653991	0.703886	0.703886	0.332925	0.611046	0.8901	0.93988	0.951602	0.951602	0.519008	0.911062	0.911062	0.234012	0.728419	0.70684		0.429082	0.516367	0.686026	1.00344
	38.39	0.904795	0.260913	0.9281	0.818256	1.24767	0.86357	0.860348	0.584548	-0.005033	0.531647	0.506325	0.216125	1.06688	2.97633	0.599378	0.641302	0.742228	1.86707	0.362318	0.812168	1.21826	1.70212	0.910472	0.397711	-0.0184195	1.02863	0.70951	0.70951	0.464005	0.831752	0.831752	0.421263	0.633648	0.758609	1.20927	1.03454	1.03454	0.467468	0.914404	0.914404	0.533605	0.76235	0.72495		0.427029	0.417585	0.717623	1.08708
	38.93	0.910726	0.448598	0.978672	0.496994	0.907738	0.837873	0.835095	0.965928	0.23896	0.428287	0.59254	0.301272	0.901821	1.32859	0.641243	0.721493	0.780785	2.31185	0.427771	0.65093	0.74738	0.90017	0.794034	0.488598	0.581913	1.00768	0.601297	0.601297	0.634618	0.745323	0.745323	0.44155	0.517652	0.803621	1.04957	1.15335	1.15335	0.431826	0.863989	0.863989	0.310384	0.977595	0.738051		0.453872	0.561266	0.645993	0.986939
	39.46	0.759534	0.385989	1.14554	0.838259	1.0223	0.989693	0.757877	1.09403	0.302437	0.60966	0.540087	0.299405	0.908559	2.24871	0.782811	0.606237	0.825981	1.30073	0.370126	0.786296	1.22619	1.09544	0.895315	0.592514	-0.133224	1.01183	0.805102	0.805102	0.64424	0.90294	0.90294	0.417828	0.630478	0.826719	1.25018	1.47984	1.47984	0.475715	1.2169	1.2169	0.381644	0.641068	0.917725		0.449653	0.53796	0.645122	1.27317
	39.99	0.967217	0.528847	0.987033	0.82311	1.06893	0.630427	0.671874	1.01966	0.101012	0.424197	0.609145	0.419783	1.02783	2.23342	0.679052	0.731596	0.721842	2.39289	0.18593	0.912851	0.964434	0.830175	0.996621	0.460574	0.0793286	0.847663	0.762848	0.762848	0.602352	0.664244	0.664244	0.462546	0.661333	0.831061	1.58015	0.989153	0.989153	0.500602	1.2133	1.2133	0.230932	0.990188	0.789212		0.486445	0.510224	0.693773	1.01289
	40.53	0.940965	0.532145	1.11781	0.88653	0.921569	0.712877	0.785906	0.867523	0.295173	0.786982	0.326856	0.228038	1.10305	2.42096	0.634412	0.735109	0.73938	2.94087	0.215335	0.912871	1.30695	0.759268	0.745388	0.390004	-0.0033654	0.728676	0.579169	0.579169	0.589621	0.814723	0.814723	0.498287	0.660438	0.764306	1.10001	0.946162	0.946162	0.503847	0.644265	0.644265	0.406199	0.998489	0.871197		0.503502	0.498135	0.612003	0.991464
	41.06	0.828849	0.403827	1.00927	0.637641	0.910321	0.76378	0.765878	0.818657	0.0766869	0.587299	0.472987	0.35277	1.01198	2.67782	0.949693	0.799385	0.777964	2.98291	0.234255	0.720446	0.809532	1.20417	0.880095	0.222821	-0.288855	1.01438	0.632408	0.632408	0.663705	0.665646	0.665646	0.467199	0.575497	0.813049	1.03225	1.07028	1.07028	0.455313	0.680324	0.680324	0.404079	0.699547	0.904645		0.52987	0.487691	0.729631	0.93674
	41.59	0.88804	0.376765	0.997677	0.69948	0.833134	0.839771	0.779775	0.950532	0.199233	0.638047	0.471925	0.340499	1.19694	2.73975	0.772023	0.737763	0.654104	1.81687	0.533577	0.824933	0.973014	1.18361	0.785312	0.458192	-0.041801	1.16528	0.58679	0.58679	0.698545	0.632873	0.632873	0.582501	0.675982	0.802534	1.04854	1.01757	1.01757	0.540072	0.975058	0.975058	0.239384	0.646998	0.403201		0.562426	0.474555	0.675404	1.13242
	42.13	0.760289	0.412731	1.07129	0.78363	1.20322	0.880283	0.744803	0.713356	0.479989	0.441149	0.561116	0.443201	0.846727	2.61345	0.879184	0.785692	0.634209	2.35479	0.547091	0.768131	1.04938	0.246511	0.929964	0.418316	-0.0010665	0.768324	0.675381	0.675381	0.618399	0.760199	0.760199	0.509794	0.718879	0.849155	1.2393	0.845021	0.845021	0.48428	1.02348	1.02348	0.451737	0.910701	0.84701		0.572283	0.47251	0.768851	1.06045
	42.66	1.00317	0.328697	1.07361	0.785585	1.17126	0.834645	1.07559	0.632645	0.251855	0.489282	0.447307	0.29566	1.24519	2.59106	0.674658	0.612412	0.667275	2.27347	0.450194	0.805414	1.18326	0.581396	0.944522	0.338349	0.208174	1.03032	0.637077	0.637077	0.631209	0.78185	0.78185	0.509087	0.682938	0.819754	1.41752	0.76485	0.76485	0.56727	0.929537	0.929537	0.536675	0.709288	0.742266		0.54815	0.481822	0.711042	1.01772
	43.19	0.927345	0.248281	0.831538	0.754924	0.947319	0.711022	0.839714	1.27614	-0.133034	0.723808	0.488206	0.406405	1.14199	2.92714	0.68825	0.329807	0.746886	2.84995	0.414587	0.821776	0.961484	1.12008	0.852397	0.465661	0.512516	0.969759	0.609558	0.609558	0.424356	0.634271	0.634271	0.537392	0.457792	1.04973	1.09286	0.849904	0.849904	0.586134	0.778948	0.778948	0.573777	1.00491	0.647937		0.478775	0.477014	0.702853	1.13025
	43.73	0.850915	0.386173	1.19127	0.723116	1.20258	0.757524	0.771625	0.843263	0.0658673	0.354666	0.57768	0.418183	1.12415	1.79188	0.512478	0.46705	0.670718	2.30489	0.411534	0.830487	0.55605	1.08507	0.797561	0.393672	-0.0267967	1.04863	0.50646	0.50646	0.78661	0.801789	0.801789	0.616883	0.600189	0.835009	1.14447	0.899681	0.899681	0.514796	0.886133	0.886133	0.373769	0.686778	0.646418		0.498316	0.559707	0.624018	1.38394
	44.26	0.936765	0.386968	0.725669	0.764131	0.988651	0.658756	0.850726	0.94487	0.146944	0.464076	0.563279	0.344339	1.27972	2.65264	0.739395	0.459725	0.773718	2.80504	0.557484	0.702241	0.900121	0.906456	0.72149	0.508354	0.381794	1.14437	0.577967	0.577967	0.717397	0.85258	0.85258	0.53537	0.6513	0.86795	1.4495	1.06071	1.06071	0.466539	0.794737	0.794737	0.408544	0.847583	0.586978		0.603962	0.458017	0.80054	1.16512
	44.79	0.985807	0.369021	1.12477	0.778966	1.0771	0.628419	0.770818	0.750717	0.189257	0.41508	0.400655	0.400435	1.03072	2.77606	0.633699	0.417301	0.736448	2.08011	0.499268	0.713784	1.15051	2.04577	0.75528	0.432583	0.374007	1.24013	0.618229	0.618229	0.751728	0.82107	0.82107	0.377682	0.760304	0.880829	1.01562	0.962409	0.962409	0.463288	0.878501	0.878501	0.365446	1.1139	0.543751		0.570674	0.526967	0.726608	1.222
	45.32	0.91683	0.20257	1.01856	0.735813	0.975365	0.659875	0.725692	0.550935	0.500239	0.40257	0.318785	0.421556	0.931431	3.14559	0.733114	0.584692	0.734409	2.06678	0.490979	1.00662	1.17895	1.93658	0.856322	0.476866	-0.1233	1.17102	0.622169	0.622169	0.735298	0.731442	0.731442	0.538272	0.655331	0.834943	1.07751	0.869402	0.869402	0.603772	1.01633	1.01633	0.310474	1.07885	0.90039		0.55967	0.522043	0.696809	1.22044
	45.86	0.801561	0.285906	0.810732	0.778744	0.936089	0.99667	0.799936	0.762602	0.0868665	0.433707	0.529658	0.441195	1.64658	2.6891	0.630541	0.503012	0.753069	1.61122	0.560273	0.724856	0.842167	1.1931	0.698567	0.509097	0.0253387	0.841131	0.659381	0.659381	0.670071	0.684718	0.684718	0.606441	0.453147	0.854802	1.46874	0.785965	0.785965	0.516194	1.02337	1.02337	0.42686	0.683938	0.727961		0.549678	0.534457	0.790824	0.976458
	46.39	0.891013	0.310853	1.13411	0.73454	1.32685	0.802931	1.04265	1.14043	0.107282	0.421217	0.537751	0.331013	1.3977	2.89836	0.867806	0.206875	0.754237	1.99795	0.442713	0.891752	0.703565	0.545892	0.919817	0.666043	0.226714	0.802687	0.695188	0.695188	0.681231	0.645184	0.645184	0.544285	0.564488	0.800342	1.63382	1.0791	1.0791	0.476269	0.884988	0.884988	0.439819	0.987404	0.739894		0.570149	0.569461	0.874356	1.238
	46.92	0.934541	0.373495	1.24806	0.771922	0.661129	0.765885	0.726642	0.868831	0.103444	0.279066	0.467674	0.419147	1.15109	2.28743	0.623382	0.455128	0.742674	2.02808	0.532687	0.772069	1.04834	1.35191	0.67653	0.316183	-0.0926219	1.22386	0.596292	0.596292	0.79232	0.773465	0.773465	0.598344	0.39025	0.958323	1.44827	0.845052	0.845052	0.563005	1.01063	1.01063	0.267012	0.968052	0.677207		0.55047	0.527223	0.764581	1.2062
	47.46	0.929044	0.4053	0.991775	0.679372	1.12698	0.828368	1.01171	0.525438	0.219434	0.323852	0.644653	0.404705	1.03556	2.34599	1.02093	0.217207	0.588012	1.79698	0.54185	0.669782	1.26043	1.08576	0.673752	0.297125	0.4104	1.45415	0.66519	0.66519	0.544235	0.655011	0.655011	0.485011	0.354276	0.782793	1.63683	1.00763	1.00763	0.575755	1.09465	1.09465	0.323553	0.76644	0.708366		0.588261	0.491394	0.755972	1.18538
	47.99	1.07534	0.377279	1.12132	0.889673	0.942707	0.88589	0.820838	0.658864	0.0064319	0.558233	0.632139	0.63676	1.53157	1.68814	0.807703	0.23369	0.707189	1.97525	0.750304	0.90312	0.833778	0.904307	0.853089	0.120447	-0.166039	0.948362	0.62184	0.62184	0.74337	0.709625	0.709625	0.60761	0.509752	0.858258	1.32728	0.840328	0.840328	0.499522	1.09745	1.09745	0.359952	1.06092	0.675572		0.564992	0.494684	0.696068	1.11678
	48.52	1.05537	0.398855	1.21694	0.684971	0.816919	0.841767	0.981821	0.591065	0.057672	0.662769	0.62204	0.47367	1.58238	2.21143	0.570453	0.41138	0.895803	2.6548	0.575954	0.867306	0.960061	1.26287	0.579072	0.314902	0.262776	0.681621	0.563962	0.563962	1.10418	0.699789	0.699789	0.530312	0.605536	0.889583	1.48579	1.02741	1.02741	0.465367	1.14256	1.14256	0.452576	0.625089	0.922527		0.572355	0.541547	0.790044	1.07702
	49.06	0.952417	0.331155	1.41811	0.755973	1.48096	0.776949	0.78574	0.454249	0.186186	0.396181	0.323993	0.386251	1.21304	2.58244	0.926059	0.476964	0.890168	2.4378	0.454033	0.718806	1.21506	1.24634	0.815766	0.275431	-0.0435719	0.851488	0.554373	0.554373	0.859196	0.770562	0.770562	0.308596	0.609278	0.838877	1.05924	0.869245	0.869245	0.485309	1.05355	1.05355	0.365447	0.912918	0.676775		0.605501	0.486419	0.696559	1.05431
	49.59	1.02066	0.31766	0.957776	0.616186	0.905099	0.897197	0.953457	0.619635	0.28301	0.378526	0.520913	0.400848	1.23971	2.33198	0.545197	0.382697	0.721848	2.58522	0.585728	0.69962	1.22654	1.05438	0.712126	0.167168	0.635664	1.2658	0.681528	0.681528	0.782648	0.820549	0.820549	0.334792	0.662946	0.889054	1.09695	0.69717	0.69717	0.388953	1.0749	1.0749	0.249138	0.954295	1.02922		0.634338	0.502779	0.697373	1.13503
	50.12	0.989225	0.437195	1.17294	0.745748	1.0638	0.89598	0.790543	0.589344	0.227891	0.555474	0.574281	0.479484	1.13208	2.78175	0.94624	0.222602	0.631167	2.12643	0.619659	0.874426	1.26297	1.94029	0.734413	0.30336	0.229272	1.1007	0.591469	0.591469	0.6872	0.940031	0.940031	0.524322	0.352886	0.820183	1.26113	0.832776	0.832776	0.45256	0.96618	0.96618	0.231976	1.10106	0.798593		0.593334	0.499649	0.707006	0.987689
	50.66	0.953782	0.654419	1.27794	0.823561	1.18342	0.864055	0.998921	0.624898	0.0207943	0.472569	0.646004	0.417909	1.16908	1.81439	0.820388	0.113602	0.59829	2.07386	0.4691	0.767546	1.50783	1.76334	0.726372	0.235203	0.500508	1.3518	0.583018	0.583018	0.978685	0.946562	0.946562	0.498661	0.453478	0.851649	1.0124	1.00564	1.00564	0.558127	0.930545	0.930545	0.418227	1.08274	0.563317		0.569154	0.535934	0.836933	1.09336
	51.19	0.956655	0.461189	1.11305	0.844499	0.669438	0.700959	0.906333	0.312802	-0.0031473	0.530222	0.337996	0.503971	1.56042	1.97917	0.824915	0.35364	0.710895	2.31094	0.657408	0.932535	1.39497	1.54035	0.895511	0.303263	0.657766	1.41843	0.5603	0.5603	0.858099	0.860089	0.860089	0.421075	0.613977	0.848254	1.22359	0.918743	0.918743	0.485352	1.23636	1.23636	0.402108	0.826456	0.699667		0.543378	0.617719	0.729493	1.1336
	51.72	0.87599	0.34605	1.22427	0.645646	1.16813	0.881085	0.775097	0.749429	0.354913	0.764414	0.448649	0.472444	1.70153	2.27124	1.0088	-0.0099586	0.726316	2.9565	0.548276	0.717433	1.32581	1.84431	0.651599	0.258035	-0.0599559	1.36551	0.472198	0.472198	0.69328	0.830097	0.830097	0.622265	0.612246	0.895529	1.45648	0.67568	0.67568	0.446974	0.776831	0.776831	0.182225	1.02522	0.715884		0.54226	0.640278	0.750045	1.04902
	52.26	0.914899	0.301781	1.12902	0.874159	0.824727	0.838413	0.943093	0.52813	0.28443	0.69268	0.559861	0.543345	1.49992	1.97345	0.920275	0.0311738	0.658204	1.43346	0.601706	0.82508	0.914297	1.20055	0.709778	0.217836	0.646363	1.16596	0.582111	0.582111	0.804884	0.604592	0.604592	0.729053	0.545064	0.733561	1.48565	0.9039	0.9039	0.462596	1.05947	1.05947	0.191751	0.723854	0.624718		0.593955	0.54656	0.639722	1.18387
	52.79	1.03174	0.319645	1.24345	0.831283	1.00535	0.871844	1.05033	0.647538	0.264502	0.396754	0.486422	0.421872	1.54285	2.38429	1.03256	0.301627	0.735277	2.5998	0.468403	0.815913	1.00031	0.823309	0.739728	0.206464	0.657758	1.16541	0.490055	0.490055	0.685463	0.808748	0.808748	0.565998	0.644945	0.918651	1.19429	0.715913	0.715913	0.498206	0.995969	0.995969	0.435011	0.718443	0.559954		0.564638	0.600665	0.796716	0.978167
	53.32	1.02313	0.305205	1.30892	0.827673	0.929984	0.801543	0.747056	0.186706	0.153556	0.403505	0.397215	0.476502	1.44892	2.30085	0.914638	0.183055	0.651586	2.10169	0.612945	1.05387	1.61666	1.20617	0.701998	0.313501	0.394299	1.41072	0.751759	0.751759	0.778813	0.692952	0.692952	0.670594	0.561936	0.814809	1.01076	0.626674	0.626674	0.552851	1.04091	1.04091	0.328318	0.983812	0.803749		0.605294	0.552645	0.765266	1.15447
	53.86	0.933486	0.364511	1.36685	0.675035	1.07681	0.942784	0.83369	0.378234	0.152642	0.630584	0.443227	0.64642	1.13185	2.47649	0.790918	0.25347	0.886165	3.76873	0.554763	1.00388	1.12509	0.985285	0.823058	0.0848007	0.975816	1.73019	0.747758	0.747758	0.806667	0.669329	0.669329	0.613416	0.331453	0.865776	1.25165	0.700074	0.700074	0.512171	0.895528	0.895528	0.219313	0.793864	0.946		0.561539	0.583741	0.814763	1.23688
	54.39	0.975913	0.314851	1.43745	0.831404	1.09378	0.736284	0.763391	0.726151	0.216296	0.679329	0.533559	0.550711	1.36509	1.38729	0.700151	0.0521521	0.665217	1.86856	0.451428	1.18083	1.36244	1.34984	0.847934	0.0722014	0.518632	1.30172	0.575626	0.575626	0.65021	0.570906	0.570906	0.571046	0.396297	0.920357	1.2383	0.512714	0.512714	0.645804	0.896423	0.896423	0.351734	1.0415	0.481897		0.554619	0.596256	0.820819	0.933065
	54.92	1.0953	0.368151	1.3077	0.721353	0.909818	0.777474	0.964141	0.79458	-0.106431	0.576642	0.307141	0.621097	1.25967	2.46169	0.767243	0.0755023	0.87834	1.81455	0.480688	1.08652	1.47629	1.54621	0.713655	0.162242	0.307971	1.08621	0.485463	0.485463	1.04731	0.575127	0.575127	0.710389	0.522993	0.92574	1.47624	0.644412	0.644412	0.628591	0.852894	0.852894	0.482695	0.783678	0.609504		0.637458	0.63269	0.723549	1.12541
	55.46	0.905192	0.393225	1.25746	0.743085	1.15708	0.712499	0.802749	0.340749	0.173639	0.707303	0.273025	0.566325	1.27972	2.37353	1.08578	0.0569388	0.641096	2.97121	0.476487	0.954164	1.54027	0.75399	0.736004	0.0595945	0.751761	1.35505	0.528021	0.528021	0.813984	0.755017	0.755017	0.457626	0.354473	0.795023	0.965645	0.497854	0.497854	0.513626	0.747559	0.747559	0.29065	0.895634	0.385721		0.604435	0.637699	0.804699	1.2383
	55.99	1.09563	0.4633	1.31173	0.795111	1.21329	0.979485	0.762424	0.46857	0.131023	0.455967	0.740705	0.3155	1.31244	2.15219	1.00866	0.0967475	0.626099	2.18084	0.405722	1.02014	0.981825	0.737718	0.572673	0.13074	1.00901	1.36137	0.620431	0.620431	0.867101	0.852947	0.852947	0.401507	0.645629	0.807786	1.05413	0.68078	0.68078	0.471811	1.01556	1.01556	0.386824	0.858515	0.932478		0.693657	0.587631	0.814173	1.12555
	56.52	1.19666	0.37485	1.56791	0.71798	0.875966	0.917785	0.825587	0.310184	0.16379	0.638456	0.513831	0.378163	1.65617	2.25124	0.916095	0.189846	0.711265	1.89467	0.604084	1.2228	1.29944	1.33747	0.565315	0.111012	0.578577	1.59247	0.665722	0.665722	0.510413	0.761312	0.761312	0.458681	0.30619	0.875505	1.62572	0.94696	0.94696	0.593966	0.947054	0.947054	0.380608	0.881681	0.862497		0.589604	0.692678	0.750122	1.20412
	57.06	1.13357	0.315997	2.01609	0.838045	1.01864	0.672402	0.694748	0.433076	0.140346	0.591579	0.509992	0.389349	1.05387	3.20611	0.987184	0.12324	0.719826	2.23641	0.435811	1.10664	1.44582	1.73203	0.497774	0.183978	0.429129	1.35368	0.551016	0.551016	0.956992	0.670755	0.670755	0.473062	0.311777	0.820804	1.47853	0.760747	0.760747	0.629498	1.19335	1.19335	0.359238	0.862524	0.649667		0.612391	0.738911	0.725023	1.25449
	57.59	1.11294	0.387732	1.62904	0.801865	0.995878	0.770706	0.73562	0.401277	0.0696222	0.558805	0.458967	0.372833	1.03597	2.32903	0.804524	0.0619082	0.69903	2.65909	0.738961	0.920322	1.27106	1.93458	0.633087	0.101519	1.01802	1.21266	0.549259	0.549259	0.69691	0.750417	0.750417	0.534107	0.335958	0.772319	1.74919	0.584946	0.584946	0.509366	1.00049	1.00049	0.42407	0.997182	0.710014		0.575088	0.600458	0.851168	1.28849
	58.12	1.19772	0.25835	1.42731	0.914946	0.720019	0.934435	0.913048	0.732071	0.248096	0.62216	0.480443	0.374083	1.18306	2.66237	1.00252	0.0169008	0.753185	1.45539	0.81276	1.00083	1.50066	0.906202	0.501524	0.225259	0.4308	1.57499	0.625325	0.625325	0.664827	0.750391	0.750391	0.710943	0.557092	0.79781	1.29486	0.636988	0.636988	0.574644	0.826221	0.826221	0.47693	0.92642	0.701319		0.554781	0.73819	0.836146	1.26998
	58.66	1.0141	0.322945	1.25585	0.807367	0.660733	0.839902	0.747896	0.667318	0.425911	0.367049	0.496569	0.304092	1.62572	2.70133	0.922642	0.259658	0.7085	1.71695	0.555392	1.18138	1.09058	1.023	0.528397	0.175675	0.682437	1.42264	0.627501	0.627501	0.704601	0.945811	0.945811	0.670312	0.448146	0.715289	1.71463	0.571335	0.571335	0.550834	1.19555	1.19555	0.446447	0.964221	0.336937		0.586642	0.688056	0.720218	1.35577
	59.19	1.25546	0.194771	1.35342	0.746264	1.2361	0.81182	0.692777	0.384371	0.277116	0.504105	0.551473	0.311884	1.06844	3.10846	1.01585	0.150965	0.763874	2.02275	0.506032	1.14424	1.35398	0.766693	0.628569	0.173517	0.483328	1.30468	0.77242	0.77242	0.826767	0.957602	0.957602	0.644456	0.456222	0.801177	1.22272	0.651119	0.651119	0.528269	0.647476	0.647476	0.356654	0.85364	0.853897		0.655435	0.720156	0.782106	1.20721
	59.72	0.955816	0.339298	1.30293	0.638528	1.3216	0.811969	0.734689	0.375571	0.104398	0.774582	0.334558	0.432595	1.22262	3.62093	0.919057	0.100566	0.7572	1.80216	0.554813	1.0386	1.485	1.09104	0.61585	0.157534	1.18952	1.64464	0.665785	0.665785	0.754204	0.684604	0.684604	0.654906	0.270227	0.812266	1.05619	0.716087	0.716087	0.619824	0.87972	0.87972	0.282223	0.956239	0.61857		0.561757	0.726071	0.744911	1.25885
[truncated: 24 more columns]
