# Supplementary material for: Integrin-based diffusion barrier separates membrane domains enabling the formation of microbiostatic frustrated phagosomes
Source: eLife. 2018 Mar 19;7:e34798. doi: 10.7554/eLife.34798 (PMC5897098; doi:10.7554/eLife.34798)
Supplement: Figure 7—source data 2. [file elife-34798-fig7-data2.xlsx]

## Sheet: Sheet1
Figure 7E		Fractional Recovery
	Time (sec)	Lyn11-GFP C. albicans phagosome cup																																				Lyn11-GFP plasma membrane
	0	0	0	0	0	0	0	0	0	0	0	0	0	0	0	0	0	0	0	0	0	0	0	0	0	0	0	0	0	0	0	0	0	0	0	0		0	0	0	0	0	0	0	0	0	0	0	0
	0.53	0.0407637	-0.0260664	-0.0166358	0.092968	-0.0492079	-0.0649259	-0.131697	0.0617115	-0.0349667	0.0045124	-0.035957	-0.0074561	0.0848409	0.0133906	-0.0058406	-0.0084583	-0.0570716	0.0674484	0.0210662	0.0991769	0.0543196	-0.0475637	-0.0146998	-0.0126368	0.152311	0.0166575	0.0584101	0.0135331	0.0467467	0.0658844	0.0119331	0.123992	0.119627	0.0202237	-0.0362599		0.279073	0.0198698	0.252135	-0.0088342	0.0103869	0.0926999	0.0749566	0.155082	0.0929541	0.129822	0.0215072	0.113531
	1.07	0.0385971	-0.0166066	-0.0760587	0.127237	-0.0567604	-0.0812891	-0.0492791	0.0790635	0.134302	0.155754	0.0557328	0.0364382	0.134837	0.0508728	0.0435566	0.0309686	0.452162	0.244389	0.0320884	0.17926	0.125476	0.0471303	0.0380591	0.0314141	0.282959	0.0415513	0.237225	0.0430088	0.06943	0.0666046	0.0431092	0.0735654	0.146212	0.044675	0.0480233		0.0363397	0.0995838	0.193498	0.103213	0.15242	0.199723	0.130637	0.19139	0.133662	0.015927	0.215444	0.185438
	1.6	0.0462557	-0.0797985	-0.0929952	-0.0043228	-0.0198255	-0.0979348	0.0514994	0.0771663	0.131358	0.0317558	0.0724594	0.0028568	0.0765951	0.0421975	0.028772	-0.0085393	0.310476	0.198765	0.0477804	-0.0221751	0.158153	0.0754722	-0.0122619	0.0315098	0.232195	0.0643774	0.145127	0.106892	-0.0018891	0.0719498	0.0215791	0.161135	0.0381808	0.0602603	0.154547		0.160885	0.237445	0.358486	0.0871086	0.0882985	0.241517	0.235652	0.478108	0.204936	0.155481	0.229415	0.22082
	2.13	0.0348149	-0.0703721	-0.0128514	0.0563784	-0.0465925	-0.113651	-0.0356939	0.0875014	-0.0485498	0.172429	0.0297097	0.0262814	0.154265	0.0311704	0.0035284	-0.0482717	0.214454	0.278475	0.0456482	0.14757	0.106964	0.182897	0.0155952	0.0163792	0.216503	0.0255059	0.13523	0.0182632	0.0840128	0.0760329	0.0303214	0.0230823	0.0521235	0.0540331	0.0466931		0.213166	0.254771	0.186929	0.122287	0.23779	0.19748	0.302573	0.331849	0.259744	0.25378	0.233987	0.303894
	2.67	0.0833613	-0.0340843	-0.108776	0.0341692	-0.0381506	-0.15179	0.0591211	0.15141	0.138663	0.133747	0.069495	-0.0033409	0.0410272	0.0463574	0.0076951	-0.0002634	0.246153	0.324657	0.0487168	-0.0082525	0.0814521	0.0980703	0.133373	0.031672	0.0763135	0.0643132	0.169461	0.0622412	0.0609898	0.102138	0.02287	0.0434519	0.0495506	0.0431703	0.0089343		0.264458	0.18849	0.428768	0.239667	0.0694142	0.268544	0.290517	0.616709	0.251696	0.128936	0.353687	0.317914
	3.2	0.0951927	-0.0230587	-0.0980601	0.168598	-0.0112147	-0.0927833	-0.0165114	0.13468	0.0153871	0.0600433	0.0066537	0.003817	0.0716427	0.032422	0.0078017	-0.0280887	0.173759	0.262323	0.0511626	0.0710383	0.0844264	0.0167741	0.067124	0.0201925	0.203397	0.0821366	0.108984	0.0409295	0.145241	0.0989787	0.0367888	0.0536292	0.0534322	0.076788	0.405008		0.128623	0.247068	0.402581	0.275074	0.267927	0.348668	0.342299	0.124227	0.373466	0.397615	0.323138	0.398908
	3.73	0.0846964	-0.063001	-0.0631322	0.275014	-0.0641371	-0.115523	-0.0799316	0.115629	0.0774125	0.0961695	0.0041227	-0.0086014	0.11059	0.0584454	0.033406	-0.0307536	0.272742	0.213951	0.0722203	0.0722598	0.0892894	0.0546	0.0286458	0.0377452	0.205293	0.0978901	0.153295	-0.0061137	0.0454896	0.105066	0.0388969	0.142541	0.0293708	0.0560428	-0.126013		0.360088	0.330303	0.460795	0.310019	0.261795	0.307412	0.421276	0.498596	0.340784	0.349128	0.449623	0.446394
	4.27	0.0781187	-0.114608	-0.0504851	0.0766491	-0.0284999	-0.118068	0.0059629	0.127821	0.0152937	0.110799	-0.0010461	0.0127828	0.123078	0.0416192	0.0337889	-0.0091009	0.309531	0.319664	0.0787135	-0.0098458	0.0061869	0.0709011	0.0210295	0.0508722	0.216535	0.0883316	0.148935	-0.0158478	0.0629517	0.120717	0.0560705	0.0150458	0.140199	0.067991	-0.0624625		0.434891	0.514271	0.570881	0.422374	0.245307	0.414686	0.449953	0.185091	0.353365	0.296609	0.391389	0.477792
	4.8	0.17386	-0.0261531	-0.0998361	0.206436	-0.0243303	-0.0933245	0.0441198	0.0697426	0.0275495	0.0978537	-0.0062808	0.0200252	0.0917374	0.0545741	0.0280433	-0.0579026	0.108509	0.287507	0.0605686	0.0677459	0.0336951	0.0738769	0.0319185	0.0360724	0.272827	0.0793602	0.130916	0.0075126	0.0929487	0.105637	0.02952	-0.0537164	0.135767	0.0659771	-0.0869951		0.339941	0.379319	0.504569	0.356324	0.174471	0.457564	0.449313	0.412344	0.412935	0.525307	0.426441	0.517851
	5.33	0.0392942	-0.0560667	-0.0223435	0.102228	-0.0164683	-0.145766	0.0692927	0.189556	-0.0017884	0.057712	0.0610656	0.0129497	0.163294	0.0925811	0.0418004	0.0173958	0.31384	0.440383	0.0850072	0.0426973	0.134901	0.0596318	0.0934886	0.0708799	0.331485	0.0906515	0.144435	0.118279	0.0318397	0.167912	0.0467054	0.0049341	0.138469	0.070289	0.251445		0.318034	0.353089	0.397528	0.367026	0.237256	0.468164	0.47455	0.323964	0.46278	0.409013	0.545644	0.484907
	5.87	0.0689418	0.0190581	0.0026791	0.128983	-0.0046381	-0.0686454	0.0295625	0.153999	0.0639162	0.0698929	0.0545501	0.017388	0.0641332	0.0580957	0.0472304	0.0366586	0.237937	0.333024	0.0589357	0.0228869	0.0416442	0.0730476	0.0797588	0.0488082	0.34333	0.127594	0.0682465	0.0254769	0.0543134	0.111078	0.0707525	0.0968135	0.186727	0.0752327	0.137948		0.55762	0.364401	0.554429	0.396599	0.15562	0.518023	0.592179	0.304172	0.561613	0.463135	0.541807	0.572981
	6.4	0.140093	0.0239287	-0.0450328	0.121714	0.0157524	-0.143566	0.107338	0.146841	0.0512965	0.238089	0.0797095	-0.0088882	0.0336012	0.0794058	0.0170252	-0.0618011	0.121335	0.387386	0.0622952	0.108183	-0.0276258	0.0532537	0.144962	0.07437	0.246839	0.16993	0.0268584	-0.0132449	0.0614305	0.143964	0.0589281	0.0416078	0.184389	0.0642657	0.258738		0.401691	0.418321	0.34217	0.422981	0.317813	0.523202	0.579416	0.141252	0.472	0.522008	0.562538	0.471047
	6.93	0.0785438	-0.0784518	-0.0538104	0.291658	0.0092623	-0.0614017	0.0832148	0.191062	-0.0296449	0.0390203	-0.0058357	0.023076	0.082832	0.103929	0.0297325	0.0323378	0.144561	0.415047	0.077066	0.0240386	0.0037284	0.0649766	0.10632	0.0949027	0.0805087	0.143417	0.0793256	0.0827801	0.0697642	0.159327	0.0803404	0.2099	0.188632	0.0762744	-0.0565826		0.418391	0.486787	0.497569	0.399342	0.316269	0.630865	0.614617	0.711341	0.595444	0.436246	0.678338	0.589528
	7.46	0.0743051	-0.0120078	-0.0773656	0.161413	-0.0340719	-0.0821084	0.0400152	0.120028	-0.0679524	0.0781698	0.0294789	0.0132791	0.0688135	0.0701265	0.0553054	-0.0779688	0.273312	0.452193	0.0982418	0.0431143	0.0480225	0.0769671	0.0948629	0.0687609	0.1462	0.151565	0.198953	0.123855	0.0667113	0.134865	0.0635439	0.0452776	0.14092	0.0781377	0.0518297		0.358784	0.520673	0.506985	0.430695	0.308976	0.561896	0.595823	0.457221	0.516302	0.444116	0.604079	0.639311
	8	0.081096	-0.0790158	-0.0031575	0.165581	-0.0071945	-0.0660976	0.045268	0.157977	0.0320295	0.3305	0.0012327	0.0543561	0.11727	0.115914	0.0406093	-0.0206462	0.104811	0.401394	0.0810408	0.109309	0.136688	0.0677934	0.1196	0.074244	0.215388	0.13008	0.147401	0.0451472	0.10384	0.131468	0.0728301	0.0221211	0.183679	0.0795085	0.091956		0.244285	0.562071	0.579847	0.467801	0.383213	0.635686	0.772939	0.331781	0.555541	0.486951	0.727155	0.59891
	8.53	0.153971	0.0710357	-0.0044942	0.106065	0.0124983	-0.072927	0.0882403	0.303258	0.0425801	0.138382	-0.0073106	0.044609	0.200624	0.0824887	0.0392559	-0.024688	0.304957	0.46333	0.0817563	0.109519	0.0638427	0.129148	0.0336051	0.0245201	0.18569	0.16207	0.130067	0.122634	0.0792895	0.126966	0.0834186	0.204799	0.0468185	0.0923254	0.0016926		0.352804	0.681578	0.670027	0.484427	0.293683	0.662726	0.739954	0.568607	0.541169	0.523205	0.677024	0.619
	9.06	0.103863	0.0276428	-0.0135078	0.0969925	-0.0055367	-0.0872527	0.165679	0.16543	0.0784073	0.182245	-0.0459611	-0.0115367	0.131819	0.0854093	0.0328108	0.0045288	0.119735	0.400753	0.0970914	0.0279258	-0.0010352	0.0621894	0.0681246	0.0816483	0.0775502	0.147315	0.219661	0.0837061	0.0684994	0.171785	0.091969	0.151982	0.107789	0.101154	0.257034		0.449481	0.468996	0.477318	0.501067	0.308732	0.609943	0.717946	0.435274	0.719818	0.602743	0.645869	0.670947
	9.6	0.121322	0.0060835	-0.121684	0.0927157	-0.0161391	-0.167298	0.174218	0.162997	0.0470861	0.0984258	0.0029496	0.0431989	0.109967	0.0998165	0.0609537	0.0217792	0.211513	0.388633	0.0834121	0.100193	0.007653	0.117317	0.0353218	0.0538642	0.313048	0.231524	0.221681	0.0062514	0.0845164	0.137759	0.112836	0.115156	0.192624	0.094815	0.197016		0.550465	0.587637	0.59809	0.45232	0.408538	0.642312	0.711416	0.876202	0.732606	0.434144	0.71444	0.654214
	10.13	0.152829	0.0726037	-0.0811156	0.171831	0.042223	-0.100241	0.137661	0.280723	0.127467	0.166002	-0.0374973	0.0496688	0.208966	0.0865951	0.0428594	-0.0252202	0.0296837	0.349041	0.0851436	0.0255276	-0.0069225	0.0895464	-0.0014268	0.0871169	0.276356	0.121025	0.0618917	0.0221676	0.0754021	0.158067	0.11859	0.226115	0.0927722	0.0843872	0.0300444		0.674376	0.540602	0.525539	0.52357	0.429275	0.600792	0.737545	0.230926	0.679116	0.648851	0.76114	0.709407
	10.66	0.14154	0.0922376	-0.0035126	0.135703	-0.004347	-0.0930715	0.163886	0.233551	0.103798	0.190829	0.0688532	0.0388382	0.117438	0.071836	0.0237853	-0.0073415	0.185401	0.415945	0.0877889	-0.0630151	-0.0299671	0.113598	0.145247	0.0687881	0.297454	0.186835	0.245818	0.0139234	0.0557656	0.144927	0.104065	0.137238	0.11459	0.089019	0.152681		0.38921	0.672887	0.674268	0.689343	0.303414	0.59319	0.841572	0.659441	0.800046	0.744342	0.779043	0.70424
	11.2	0.131067	-0.0254891	-0.0382732	0.11604	0.0412457	-0.10152	0.0637037	0.247538	0.12924	-0.0129312	0.0538344	0.0720745	0.0748725	0.0915331	0.0500591	-0.0055354	0.155827	0.363293	0.0915102	-0.0238302	-0.0715341	0.131622	0.146097	0.0990742	0.255941	0.166389	0.228861	0.0732829	0.0827537	0.168969	0.115567	0.171342	0.128432	0.0996881	0.174096		0.485082	0.68736	0.722818	0.627145	0.271438	0.708792	0.833471	0.527763	0.685445	0.850134	0.684789	0.71465
	11.73	0.169195	0.104917	0.0237175	0.202962	-0.0285502	-0.122113	0.130337	0.210417	0.0841469	0.208867	0.0453997	0.0513524	0.170665	0.127602	0.0402108	-0.0429285	0.213763	0.412751	0.0891022	0.0428882	-0.0340978	0.144563	0.11577	0.0673541	0.287878	0.200489	0.167162	0.0627019	0.0914601	0.160971	0.0897757	0.0953121	0.119849	0.0889553	0.0962007		0.454611	0.608167	0.736018	0.553752	0.374823	0.661829	0.803816	0.469178	0.712326	0.778752	0.847571	0.722625
	12.26	0.137639	0.0720632	-0.0100211	0.0943762	0.0195998	-0.0785907	0.0611384	0.297479	0.0952554	0.220262	0.0790428	0.0431883	0.163347	0.101822	0.0346575	-0.0648249	0.290342	0.445249	0.0833111	0.093125	0.0423879	0.155561	-0.0313338	0.0664063	0.196061	0.226781	0.175442	0.14193	0.0505431	0.11503	0.106717	0.140935	0.157959	0.0978168	0.196982		0.551554	0.639979	0.734055	0.647366	0.378336	0.651592	0.848611	0.330701	0.837155	0.895107	0.79396	0.732106
	12.8	0.12479	0.0241222	-0.057538	0.197775	0.0674305	-0.128891	0.141023	0.23777	0.0504985	0.082766	0.0842357	0.0405321	0.0520188	0.120937	0.0494016	-0.0499103	0.185683	0.522396	0.0771466	-0.008953	-0.0001693	0.0844559	0.114843	0.0825496	0.13314	0.225435	0.142128	0.108669	0.0442293	0.129039	0.119675	0.193037	0.139083	0.085692	0.116931		0.576532	0.615347	0.566562	0.663805	0.266265	0.734877	0.91162	0.38896	0.717912	0.733063	0.811612	0.655236
	13.33	0.177897	0.129579	-0.0797281	0.175894	-0.0105373	-0.0518602	0.0891026	0.207494	0.0629002	0.155519	0.0325136	0.0971629	0.0525451	0.116036	0.0449855	-0.115001	0.373656	0.287064	0.0992063	0.0579856	0.0290048	0.131583	0.0968879	0.0581805	0.314015	0.181639	0.171167	0.127116	0.0755968	0.169213	0.126616	0.114336	0.0818519	0.0863722	0.23901		0.494238	0.60531	0.519555	0.710505	0.200984	0.667912	1.01466	0.58875	0.689847	0.720858	0.78258	0.767356
	13.86	0.147706	0.135942	-0.0149783	0.15412	-0.0050985	-0.0459726	0.188411	0.197005	0.0217422	0.0761333	0.0717645	0.0889179	0.0924448	0.122575	0.0394999	-0.0293783	0.165077	0.354803	0.0876631	0.0479334	0.0436639	0.111832	0.0642397	0.0736203	0.264653	0.20937	0.152031	0.0568229	0.0726457	0.16874	0.134281	0.158923	0.100599	0.0980599	0.212063		0.845793	0.658193	0.592701	0.788064	0.29141	0.787568	0.894698	0.445491	0.80167	0.720557	0.883275	0.842838
	14.4	0.148983	0.0057985	0.0119332	-0.001093	0.0446078	-0.0912968	0.156683	0.254775	0.0130787	0.267983	0.0421578	0.0654804	0.0825549	0.153177	0.0625964	-0.0091886	0.0492525	0.432499	0.0951142	0.112204	0.0472483	0.15906	0.0317178	0.0836577	0.276269	0.230002	0.177912	0.208597	0.0986219	0.178429	0.130415	0.0632969	0.129238	0.107245	0.31575		0.776553	0.560447	0.737283	0.691351	0.178418	0.696535	0.964579	0.787977	0.840781	0.747621	0.894473	0.814791
	14.93	0.108077	0.0089798	-0.0334959	0.143941	0.086898	-0.0758365	0.215712	0.232292	0.0471998	0.076717	0.0922941	0.0509879	0.0980731	0.118184	0.0491564	-0.0269254	0.077692	0.400765	0.0886205	0.160069	0.063731	0.113803	0.122907	0.105214	0.290136	0.253828	0.18151	0.142954	0.0696857	0.196079	0.136058	0.118834	0.0694545	0.0924016	0.0412379		0.762922	0.558252	0.611084	0.717987	0.283373	0.674331	0.994728	0.659558	0.862665	0.874359	0.837573	0.746014
	15.46	0.0935395	0.143885	-0.053543	0.0418352	0.128855	-0.106079	0.251233	0.319302	-0.0147506	0.0324435	0.0929782	0.0503873	0.0883324	0.155841	0.0556646	-0.0787778	0.187251	0.322496	0.1066	0.0644647	0.122714	0.0777658	0.0950437	0.0873659	0.140573	0.197144	0.112533	0.0754477	0.109273	0.162253	0.136631	0.0467711	0.128097	0.0874097	0.243764		0.669984	0.73458	0.730325	0.776819	0.375923	0.712199	1.06481	0.564753	0.731663	0.866359	0.989499	0.739179
	16	0.0824968	0.0708608	-0.0245902	0.110193	0.039903	-0.0943329	0.0930323	0.278029	-0.0106081	0.0875711	0.0946946	0.0829574	0.096614	0.107528	0.0853463	0.0675224	0.156944	0.526397	0.10733	0.149405	0.0809337	0.146465	0.0220975	0.113575	0.178245	0.265344	0.135127	0.225824	0.138875	0.13822	0.129688	0.0996123	0.151379	0.111491	0.34896		0.604564	0.65734	0.671072	0.779264	0.348178	0.708011	0.932407	0.469452	0.779038	0.832291	0.798756	0.809841
	16.53	0.107369	0.0425653	-0.0073648	0.0447464	0.0679182	-0.0691793	0.0839304	0.382255	0.0441728	0.203563	0.0017412	0.0170868	0.187557	0.170371	0.0412479	0.078215	0.150649	0.440704	0.10948	0.0938996	0.147063	0.115687	0.0831362	0.0772078	0.215747	0.27172	0.289779	0.132935	0.134003	0.153539	0.167566	0.125019	0.145532	0.10073	0.141123		0.422283	0.624649	0.623749	0.758615	0.341033	0.718596	1.08119	0.629456	0.747388	0.916199	0.839363	0.794796
	17.06	0.137272	0.0685079	-0.0190816	0.141423	0.0537117	-0.0834807	0.0672778	0.25797	-0.0381299	0.185834	0.0411361	0.0965004	0.149821	0.139778	0.0519168	-0.0537198	0.211753	0.481895	0.10679	0.192577	0.125467	0.0966909	0.0371794	0.110853	0.166804	0.261678	0.272197	0.102687	0.0676065	0.181871	0.154551	0.228653	0.0889999	0.0971431	0.193449		0.766531	0.726315	0.759127	0.796114	0.360396	0.761972	1.00001	0.746156	0.928973	0.939656	0.787837	0.809142
	17.6	0.182855	0.187108	-0.0341826	0.129549	0.0622311	-0.133265	0.201162	0.262256	-0.0093658	0.184437	0.0960616	0.0692574	0.208003	0.132468	0.0611967	-0.0051017	0.0903301	0.480523	0.114713	0.0591945	0.0120766	0.0901054	0.0687599	0.0973793	0.173018	0.230514	0.288951	0.163196	0.0901641	0.191614	0.163212	0.171029	0.160938	0.118816	0.0912681		0.65272	0.646197	0.693335	0.748245	0.254995	0.729099	1.072	0.714806	0.797432	0.873493	0.821526	0.866715
	18.13	0.100596	0.188768	-0.0604739	0.127834	0.0679457	-0.097028	0.242527	0.287778	-0.0589676	0.162766	0.0911151	0.101807	0.12412	0.127781	0.0532747	0.0852048	0.297804	0.449834	0.106309	0.114741	0.0585136	0.189884	0.0820552	0.0844986	0.32524	0.251008	0.204317	0.132357	0.103102	0.157997	0.168365	0.168402	0.175951	0.110787	0.0432162		0.50843	0.779961	0.752595	0.697597	0.272503	0.785354	1.09556	0.880059	0.833061	0.941387	0.831179	0.8565
	18.66	0.0371387	0.155955	0.0197575	-0.0393353	0.0631974	-0.114282	0.15267	0.329787	0.0879106	0.20987	0.031008	0.045207	0.276004	0.130712	0.0506574	-0.0424364	0.259719	0.465637	0.104568	0.0741618	0.0554438	0.0428115	0.0392712	0.0825021	0.211975	0.283734	0.176708	0.230603	0.103251	0.16358	0.160415	0.203201	0.128845	0.0966256	0.25735		0.850491	0.557478	0.688839	0.84521	0.39169	0.804859	1.09918	0.520633	0.878393	0.760718	0.825738	0.864101
	19.2	0.122322	0.0532346	0.0199202	0.0707092	0.0887856	-0.116661	0.298899	0.317633	0.0682454	0.207046	0.119047	0.084685	0.164136	0.164825	0.0515777	0.0011021	0.240154	0.49286	0.0937107	0.0018361	0.0456811	0.0991328	0.118872	0.0917492	0.106755	0.263617	0.243789	0.185592	0.108969	0.19721	0.188107	0.270713	0.17984	0.103267	0.314828		0.558653	0.635375	0.703195	0.804642	0.284274	0.794645	1.08163	0.37204	0.831952	0.754693	0.875909	0.86067
	19.73	0.116761	0.127539	0.011062	-0.0213042	0.0754215	-0.0844817	0.232316	0.379473	-0.0665064	0.158091	0.0375405	0.0310781	0.183153	0.172852	0.0463697	0.0298521	0.18803	0.488344	0.111872	0.0509776	0.0374665	0.197195	0.14819	0.0884041	0.21033	0.251946	0.238428	0.235404	0.0907619	0.224193	0.163816	0.126017	0.121931	0.126198	0.133052		0.645089	0.868946	0.526594	0.780415	0.351371	0.732283	1.0323	0.756644	0.871107	0.952312	0.783415	0.87188
	20.26	0.118331	0.102159	-0.0071016	0.0669634	0.0784007	-0.0956277	0.274485	0.346615	0.0540294	0.268963	0.0858942	0.0647897	0.362228	0.149421	0.0759384	0.0007671	0.256374	0.485962	0.106241	-0.0136559	0.125796	0.157827	0.083085	0.110397	0.35897	0.292249	0.260025	0.252508	0.0739945	0.183809	0.173839	0.186958	0.110624	0.121423	0.19543		0.833861	0.673063	0.635864	0.890562	0.342534	0.787796	1.00519	0.777351	0.849731	0.941388	0.779608	0.884177
	20.8	0.149445	0.0924057	0.0228622	0.0104644	0.053294	-0.0976309	0.226313	0.280994	0.0464967	0.167753	0.0515766	0.0640665	0.23327	0.109237	0.0662808	-0.0187011	0.417476	0.450842	0.102788	0.0092395	0.0671148	0.0952791	0.200255	0.0710247	0.11218	0.244292	0.33681	0.185529	0.133567	0.205601	0.211643	0.207704	0.153188	0.0987551	0.0231958		0.670014	0.854319	0.580996	0.785641	0.371746	0.85308	1.09226	0.640726	0.779384	0.83819	0.802924	0.89023
	21.33	0.155264	0.171462	-0.0390519	0.0324964	0.0556968	-0.0263051	0.240297	0.246649	0.0890299	0.24819	0.0887865	0.0712438	0.107231	0.185964	0.0711951	-0.0970392	0.317317	0.388993	0.11385	-0.018433	0.021415	0.146369	0.1683	0.0718251	0.11589	0.263579	0.151233	0.248657	0.0965017	0.161147	0.217081	0.149357	0.214755	0.106439	0.418505		0.588166	0.719445	0.638329	0.857132	0.395101	0.870875	1.19618	0.90497	0.910202	0.778035	0.817984	0.816518
	21.86	0.0831217	0.0668839	-0.0322045	0.0699013	0.108168	-0.155181	0.334228	0.28113	-0.0426173	0.245626	0.0451029	0.0854427	0.299986	0.162022	0.0509639	-0.0181305	0.26508	0.460231	0.125072	-0.0216494	0.074457	0.067814	0.1415	0.130861	0.298965	0.237378	0.0871089	0.218805	0.120953	0.195078	0.151301	0.118804	0.13371	0.107698	0.140442		0.50188	0.666681	0.649944	0.993057	0.43069	0.810552	1.11298	0.773488	0.792557	1.29574	0.822832	0.831409
	22.4	0.0381632	0.177224	0.0024452	-0.0103462	0.0632651	-0.0750508	0.257693	0.212324	-0.0030056	0.151043	0.118321	0.0889398	0.349615	0.16687	0.0522502	0.0072313	0.0507746	0.444407	0.128993	0.033924	0.0022632	0.159027	0.0441804	0.0813966	0.190678	0.25646	0.143016	0.217516	0.051859	0.166278	0.199685	0.199055	0.131109	0.111326	0.116812		0.499781	0.872735	0.888205	0.888081	0.429736	0.860951	1.13383	0.537208	0.837644	0.780559	0.779208	0.905645
	22.93	0.0732641	0.214987	-0.0438522	-0.0223396	0.0601702	-0.0679031	0.242398	0.30297	-0.0267802	0.243094	0.0845613	0.0859733	0.280795	0.179185	0.0477107	0.030265	0.120392	0.487024	0.10828	-0.0319743	0.107856	0.10218	0.163601	0.0851104	0.191407	0.263797	0.272058	0.151716	0.118989	0.182199	0.18983	0.180155	0.162262	0.100623	0.172554		0.603817	0.671998	0.728113	0.88878	0.261041	0.824195	1.14565	0.991682	0.725609	0.890366	0.844177	0.910462
	23.46	0.0467085	0.472176	0.0348098	-0.0096142	0.144182	-0.0525714	0.266734	0.404046	-0.0180148	0.355525	0.106323	0.0290068	0.329595	0.129467	0.0602611	0.0286122	0.136322	0.498201	0.133348	0.0069117	0.0453132	0.155592	0.165292	0.0962463	0.301613	0.244508	0.17549	0.136608	0.0714457	0.194227	0.205792	0.202225	0.119743	0.103508	0.114471		0.792132	0.814786	0.768102	0.847119	0.349652	0.89187	1.11532	1.30738	0.850293	0.787956	0.825466	0.902063
	24	0.129594	0.137344	-0.0225056	-0.0949253	0.132029	-0.0607762	0.237549	0.400981	0.0404786	0.212683	0.0860185	0.070197	0.240887	0.143491	0.0358532	0.0253772	0.204065	0.504708	0.137912	-0.0028321	0.0369051	0.152674	0.154123	0.125235	0.299509	0.309353	0.215848	0.170676	0.139676	0.210235	0.192807	0.162025	0.128153	0.102953	0.363713		0.815701	0.749021	0.608723	0.791845	0.465056	0.769327	1.10765	0.746284	0.742693	0.935239	0.904219	0.995845
	24.53	0.0742837	0.132623	0.0290381	-0.0354568	0.125404	-0.10261	0.289482	0.3004	0.100574	0.189853	0.100322	0.0572731	0.350704	0.131859	0.0645996	-0.0225993	0.224966	0.4309	0.117073	0.0717944	-0.0178298	0.121999	0.207566	0.100699	0.20661	0.297416	0.0933409	0.138283	0.10727	0.281486	0.213054	0.321328	0.131305	0.113056	-0.0316729		0.787844	0.765392	0.671137	0.895262	0.491536	0.830861	1.02828	0.47197	0.860202	0.744439	0.901054	0.90701
	25.06	0.125729	0.251916	-0.0066247	-0.0800366	0.0865204	-0.0459324	0.206706	0.303895	0.121865	0.217866	0.0602964	0.0409931	0.325806	0.151006	0.0685265	-0.0877336	0.492057	0.453525	0.131327	0.0083763	0.0276203	0.119494	0.150842	0.044261	0.306858	0.282328	0.192965	0.186162	0.104481	0.231212	0.199634	0.283439	0.156064	0.0914409	0.196911		0.566017	0.725595	0.655896	0.952163	0.421749	0.706883	1.20136	0.593284	0.81327	0.884353	0.79373	0.995704
	25.59	0.0870063	0.31584	0.0315015	-0.0557802	0.179803	-0.0205263	0.13761	0.356686	0.0171681	0.187162	0.0427825	0.0371652	0.248486	0.121565	0.0506765	-0.0317829	0.338376	0.466403	0.135432	-0.0708958	-0.0629963	0.111288	0.12165	0.0938137	0.422604	0.307518	0.0696708	0.161272	0.0935745	0.269069	0.187827	0.098287	0.192559	0.0942231	0.206538		0.368115	1.12377	0.735135	0.847487	0.472176	0.861946	1.10445	0.615237	0.754831	0.803648	0.84543	0.907503
	26.13	0.0742133	0.261312	0.004494	-0.0644203	0.212071	-0.0735918	0.267659	0.298288	0.0210851	0.212528	0.0493587	0.0494311	0.342618	0.12998	0.067948	-0.0624452	0.301232	0.497787	0.159737	0.0302357	0.0332589	0.103735	0.192638	0.0881828	0.347989	0.338688	0.181431	0.128141	0.114625	0.222066	0.211646	0.12454	0.157824	0.112242	0.13033		0.550767	0.783012	0.698183	0.861133	0.47377	0.7618	1.12416	0.725382	0.806253	1.03371	0.903293	1.0104
	26.66	0.0617689	0.219457	0.0155602	-0.0605573	0.164667	-0.0031239	0.246088	0.355604	-0.0113249	0.213405	0.0565516	0.058272	0.335725	0.13218	0.0419087	0.0094667	0.355844	0.496839	0.135582	-0.0273473	0.0870034	0.107478	0.179453	0.100368	0.416615	0.323664	0.16233	0.160467	0.0382616	0.213829	0.229774	0.0749013	0.180251	0.124679	-0.0153734		0.770735	0.854444	0.518322	0.948397	0.248668	0.766563	1.27014	0.821215	0.847799	1.03064	0.895553	0.919698
	27.19	0.0648713	0.221671	-0.0236495	0.0350053	0.152827	-0.053348	0.328709	0.290604	0.0618113	0.207428	0.102879	0.0237479	0.202403	0.113933	0.0416547	-0.0630699	0.315294	0.404993	0.146625	-0.0591361	0.146893	0.0628134	0.165576	0.0928684	0.36084	0.325168	0.0824245	0.147864	0.0923924	0.246491	0.249839	0.269736	0.194059	0.10518	0.303586		0.823825	0.801669	0.854157	1.02292	0.387723	0.873756	1.27567	0.851291	0.900669	0.909092	0.825372	0.978054
	27.73	0.0711449	0.251978	0.0497463	0.0240144	0.17398	-2.93e-05	0.194242	0.326241	0.0400345	0.37357	0.0924809	0.0637912	0.230058	0.144131	0.0553961	-0.0526876	0.335066	0.468714	0.139572	0.0611564	0.0761476	0.138416	0.202147	0.0894506	0.279732	0.320587	0.311952	0.176421	0.143199	0.245554	0.212967	0.293956	0.206931	0.125601	0.244075		0.365049	0.771321	0.66443	0.877047	0.470323	0.842169	1.26662	0.653161	0.865709	1.21107	0.863464	1.08299
	28.26	0.077515	0.337476	0.0542156	-0.011784	0.193937	-0.0219958	0.211815	0.263051	0.0263043	0.312917	0.0483834	0.0723344	0.303544	0.156878	0.0485904	-0.0788019	0.308354	0.474034	0.1431	-0.0078465	0.055689	0.130206	0.0991273	0.114872	0.387291	0.339961	0.230815	0.0961195	0.124372	0.237812	0.200035	0.388073	0.118986	0.121072	0.0980493		0.547135	0.852117	0.653152	1.04772	0.419263	0.829503	1.26985	0.693866	0.892781	1.10136	0.826715	1.02387
	28.79	0.0378886	0.339478	0.035755	0.169978	0.170483	-0.0214751	0.233905	0.368999	0.0016053	0.153651	0.0707409	0.086325	0.354139	0.156603	0.0725843	-0.0145187	0.258857	0.433928	0.137094	-0.0291684	0.0760799	0.114131	0.132592	0.120566	0.399688	0.245397	0.10694	0.0260594	0.091749	0.204	0.213308	0.265358	0.111077	0.107074	0.0482578		0.760021	0.797836	0.739161	0.873501	0.638177	0.833676	1.42104	0.46302	0.830335	0.944352	0.934058	1.05481
	29.33	0.0643827	0.291293	0.0311325	-0.0182776	0.195909	-0.0659	0.251509	0.199405	-0.0078597	0.313794	0.110333	0.0777906	0.227419	0.174071	0.0690209	-0.0020133	0.272064	0.491492	0.144341	0.02978	0.137785	0.106938	0.254249	0.128743	0.174958	0.332338	0.122349	0.125519	0.0963125	0.279195	0.238854	0.336952	0.150161	0.109843	0.0127998		0.516562	0.916817	0.583887	0.926083	0.406147	0.805653	1.25442	0.834823	0.873268	0.854594	0.890522	0.936915
	29.86	0.154489	0.31121	0.0184551	-0.161451	0.198757	-0.0195964	0.211917	0.363599	0.0180189	0.23099	0.13464	0.0586266	0.267207	0.135912	0.0588904	-0.0591758	0.305138	0.49114	0.176749	0.0001238	0.0579121	0.084373	0.215508	0.108298	0.300191	0.335509	0.0588497	0.0916342	0.0867333	0.291876	0.244547	0.380331	0.133394	0.113394	0.285331		0.697177	0.952605	0.787183	0.936389	0.423607	0.739335	1.2406	0.820259	0.808167	0.733726	0.973915	0.992884
	30.39	0.0419998	0.236129	0.075486	-0.122729	0.238468	-0.0500332	0.272881	0.218131	-0.0245898	0.252957	0.061454	0.117858	0.197487	0.115349	0.0533517	-0.0612221	0.131065	0.507243	0.139514	-0.0261267	0.131622	0.125086	0.177554	0.070267	0.268924	0.377197	0.088973	0.225857	0.110849	0.292056	0.21697	0.352645	0.146646	0.128326	0.142541		0.787487	0.722792	0.725145	1.02843	0.445409	0.753142	1.28117	0.813155	0.794804	0.857541	0.86335	0.969237
	30.93	0.0288893	0.42951	0.0738382	-0.0378729	0.121809	-0.0158305	0.156084	0.394152	0.0059874	0.201488	0.0850196	0.126041	0.217641	0.123604	0.0591502	0.0054482	0.10457	0.54408	0.167598	-0.0536482	0.064553	0.0928313	0.225681	0.154397	0.229096	0.333403	0.147128	0.162132	0.0685054	0.278012	0.238349	0.263117	0.129749	0.111392	0.324878		0.438225	0.735898	0.797901	0.957435	0.59733	0.760167	1.36675	0.777819	0.841997	0.834233	0.990893	1.01839
	31.46	0.0803188	0.184245	0.12662	0.0206051	0.170526	0.001131	0.213814	0.298258	0.095534	0.258182	0.182936	0.0871199	0.259573	0.121693	0.0780913	0.0505352	0.271138	0.480671	0.167443	-0.0120925	0.141523	0.141953	0.173864	0.132476	0.257452	0.27512	0.157808	0.0385903	0.111433	0.269508	0.25456	0.239767	0.0960042	0.102175	0.386734		0.684943	0.969541	0.600441	0.9205	0.338433	0.754721	1.25427	0.85691	0.757131	1.03022	0.889078	0.995024
	31.99	0.0465361	0.407387	0.0765747	0.0390621	0.136637	-0.0695721	0.240892	0.39024	0.0472241	0.306604	0.17764	0.0600355	0.206581	0.135757	0.0788848	0.0419413	0.127603	0.500653	0.168201	-0.0899796	0.119739	0.147036	0.194428	0.083961	0.272944	0.388431	0.272682	0.157352	0.11486	0.270986	0.252599	0.338459	0.0710245	0.117262	0.458033		0.865425	0.93819	0.849592	1.08876	0.436228	0.78627	1.43191	0.584834	0.788772	0.893658	0.867731	1.00576
	32.53	0.0846797	0.27496	0.165126	0.0611797	0.143731	-0.0487034	0.190423	0.317106	0.0834875	0.292329	0.159645	0.0739746	0.337903	0.142957	0.0876244	-0.0375521	0.0830816	0.467994	0.171936	-0.0434938	0.112273	0.150721	0.245402	0.141111	0.396381	0.275459	0.198904	0.0907836	0.1261	0.212898	0.251601	0.316944	0.146953	0.107685	0.0096496		0.823457	0.734998	0.715941	1.09945	0.286335	0.805157	1.34197	0.85389	0.766593	1.02687	0.957823	1.00755
	33.06	0.145513	0.353359	0.125123	-0.0565137	0.200581	-0.0325204	0.22812	0.348968	-0.0223917	0.371934	0.207184	0.0329389	0.350649	0.11675	0.0441283	-0.0912931	0.114189	0.427493	0.147829	0.048908	0.148817	0.10785	0.109131	0.11116	0.188509	0.353654	0.185993	0.108655	0.136557	0.25969	0.265281	0.428159	0.100997	0.112636	0.258305		0.967096	0.880717	0.797238	1.04994	0.446539	0.846705	1.33889	1.06897	0.840158	0.985156	0.899793	1.04108
	33.59	0.105999	0.316428	0.180711	0.0536772	0.235863	-0.011309	0.358353	0.246273	0.0401732	0.301042	0.142824	0.0707184	0.335986	0.177734	0.0655417	0.0132356	0.088963	0.470301	0.173909	-0.0480823	0.0305512	0.159582	0.192412	0.134635	0.395837	0.290805	0.187125	0.124704	0.128672	0.270841	0.208071	0.2688	0.0720118	0.109357	0.140663		1.087	0.729789	0.730988	0.970841	0.669855	0.749927	1.28927	0.872518	0.802439	0.932638	0.856282	1.0018
	34.13	0.0713488	0.229586	0.142978	0.112552	0.14679	-0.0556846	0.255678	0.251979	-0.0142804	0.324767	0.109181	0.0920066	0.284439	0.172813	0.0862988	-0.0003733	0.319604	0.553379	0.170831	0.0529432	0.105036	0.107466	0.222439	0.141549	0.413116	0.322058	0.132412	0.223767	0.146595	0.28009	0.219503	0.224037	0.0781712	0.109604	0.437397		0.855575	0.857278	0.863092	1.05869	0.422976	0.677898	1.27764	0.890879	1.03131	0.885046	1.0312	1.06411
	34.66	0.0914644	0.24139	0.182253	0.0591089	0.174166	-0.10581	0.232858	0.262284	-0.0180773	0.238506	0.138935	0.0877295	0.223812	0.141097	0.0897135	-0.0029958	0.0837732	0.616445	0.175679	0.0694679	0.112237	0.0968955	0.21456	0.140383	0.313179	0.299371	0.207417	0.170924	0.0958555	0.259761	0.267754	0.149212	0.105307	0.128387	0.0877112		0.678328	1.0091	0.7097	1.00012	0.404782	0.755752	1.2982	0.598221	0.857906	0.793914	0.844309	0.954479
	35.19	0.0626742	0.240107	0.232566	-0.0197756	0.154615	-0.0467923	0.192674	0.318263	0.0704269	0.240025	0.0875339	0.13137	0.340674	0.14617	0.082269	-0.0461002	0.0842892	0.627847	0.173807	0.0863873	0.0156894	0.112794	0.184677	0.154956	0.231729	0.330853	0.130332	0.128067	0.0948162	0.247231	0.270092	0.150358	0.110024	0.103524	0.0276622		0.902004	0.94278	0.7378	1.04302	0.588662	0.714575	1.33705	0.660742	0.92085	0.747932	0.868755	0.981537
	35.73	0.12067	0.293347	0.266462	0.0226972	0.148553	-0.0695677	0.374069	0.253786	0.170409	0.156803	0.134222	0.132916	0.311464	0.151732	0.0651009	-0.0921898	0.13644	0.444783	0.185996	0.0567317	0.0762477	0.124842	0.208065	0.148478	0.215423	0.35896	0.0824712	0.136748	0.130368	0.28275	0.229829	0.296864	0.0902216	0.105236	0.272905		0.627946	0.865872	0.788901	1.01959	0.638119	0.734607	1.33308	0.948222	0.888961	0.89505	0.8451	1.0613
	36.26	0.108766	0.269267	0.233452	-0.0006174	0.187178	-0.0115302	0.216984	0.220832	0.104716	0.335338	0.121443	0.105572	0.347054	0.146192	0.0680743	-4.53e-05	0.0931503	0.622894	0.1932	0.156765	0.127444	0.0308973	0.237625	0.153035	0.295492	0.36447	0.189195	0.132331	0.124386	0.259081	0.212339	0.466906	0.0592377	0.11454	0.259379		0.899665	0.826765	0.739964	1.09512	0.433024	0.723093	1.26496	0.869847	0.994995	0.815191	0.952835	1.04741
	36.79	0.131393	0.340303	0.233372	-0.0056037	0.160742	-0.107942	0.252219	0.186345	0.154969	0.384757	0.224335	0.0637637	0.299241	0.142772	0.044571	-0.0069861	0.103816	0.493063	0.174535	0.107006	0.0465552	0.0991279	0.194272	0.139929	0.304264	0.361256	0.112055	0.147704	0.0946557	0.27714	0.21226	0.336481	0.117996	0.110452	0.226357		0.423384	0.883419	0.671152	1.03156	0.465943	0.769962	1.20224	1.25424	0.955549	0.71695	0.999854	1.0784
	37.33	0.0474737	0.28443	0.231986	-0.139935	0.154416	-0.0717157	0.283142	0.227502	0.059925	0.200336	0.164065	0.114927	0.293391	0.148662	0.0824226	0.0004066	-0.0048338	0.595399	0.174655	0.0496742	0.0971799	0.0697097	0.18469	0.115963	0.263483	0.352761	0.180559	0.0895721	0.0813693	0.222385	0.266145	0.231559	0.0687879	0.0963205	0.289854		0.983245	0.908153	0.744537	1.05459	0.542693	0.73242	1.22163	0.662512	0.867497	0.797857	0.957264	0.959047
	37.86	0.127731	0.198014	0.271802	0.147704	0.150164	-0.0017791	0.281742	0.191164	0.0361825	0.249615	0.100155	0.0511887	0.221105	0.15969	0.0739234	0.0282474	0.137671	0.67862	0.176329	0.135352	0.106015	0.0394698	0.249142	0.106923	0.312978	0.394734	0.206408	0.106096	0.0680578	0.279313	0.243245	0.27163	0.059488	0.107752	0.0868286		0.930424	0.734474	0.925343	1.05768	0.512084	0.597394	1.26668	0.826676	0.986759	0.877258	0.893289	1.04604
	38.39	0.0682838	0.256851	0.302493	-0.0158994	0.134123	0.0333707	0.212613	0.159317	0.0259171	0.324975	0.130805	0.116814	0.383048	0.116813	0.0838481	-0.0287725	0.135022	0.57133	0.176206	0.119962	0.0225447	0.0845295	0.244818	0.164986	0.26982	0.363235	0.0884367	0.10782	0.0930771	0.285434	0.230046	0.236701	0.0945403	0.115324	0.282566		0.987152	0.859726	0.747229	0.986401	0.512752	0.68321	1.3741	1.19447	0.968164	0.897966	0.891222	0.991071
	38.93	0.0914905	0.228775	0.322797	0.00119	0.124306	-0.0138145	0.184506	0.125446	-0.102674	0.289169	0.0890082	0.138402	0.291088	0.136979	0.0989824	-0.0719436	0.0558204	0.496269	0.194529	0.152141	0.16259	0.133755	0.129411	0.125216	0.364685	0.437908	0.126199	0.0964501	0.115864	0.28682	0.275387	0.278086	0.0545364	0.103767	0.322679		0.891727	0.937412	0.765999	1.12533	0.493576	0.719978	1.3398	1.15374	0.933934	0.876999	0.943951	1.00009
	39.46	0.123742	0.143092	0.462667	-0.0709686	0.188553	-0.0116468	0.17199	0.204275	-0.0677002	0.273068	0.161201	0.147566	0.330313	0.177122	0.0652101	-0.0235563	0.0357101	0.611275	0.200055	0.152984	0.0656729	0.161875	0.246908	0.124786	0.250439	0.381237	0.158342	0.0519613	0.0996654	0.260356	0.237697	0.140768	0.0734944	0.0990446	0.499225		1.04992	0.982498	0.690784	1.17008	0.520583	0.645337	1.34108	0.648562	1.01626	0.763441	0.940315	0.93931
	39.99	0.137095	0.211738	0.332713	-0.0355028	0.200059	-0.066993	0.14574	0.194754	0.127801	0.397352	0.270946	0.0707813	0.347764	0.125995	0.0790714	0.0735602	0.186578	0.636686	0.188995	0.110165	-0.0084005	0.0890278	0.265454	0.126065	0.225663	0.380974	0.19873	0.125303	0.133568	0.249932	0.230923	0.452313	0.116314	0.0945368	0.4358		0.768588	1.03959	0.657334	1.1389	0.448644	0.706886	1.38703	1.4463	0.885925	0.855975	0.836432	1.04373
	40.53	0.0901198	0.381659	0.370693	-0.066283	0.175312	0.0138972	0.143307	0.151471	0.0347384	0.35827	0.115969	0.138638	0.380247	0.140458	0.11169	-0.0427248	0.0548709	0.494277	0.185424	0.0313384	0.15886	0.114215	0.154659	0.184938	0.285843	0.411907	0.157942	0.132515	0.141025	0.289784	0.258032	0.345842	0.193149	0.12101	0.334162		0.94135	1.00477	0.637336	1.20323	0.485905	0.661065	1.28295	1.05342	0.892139	0.85278	0.85198	1.05404
	41.06	0.08132	0.325897	0.412094	-0.092386	0.17596	0.039057	0.205249	0.130513	-0.0485872	0.350931	0.136935	0.10226	0.270827	0.195567	0.0606737	0.0118833	0.0309733	0.619239	0.198591	0.195228	0.0475246	0.0985533	0.231581	0.185684	0.39543	0.434891	0.0870618	0.0749005	0.098743	0.351169	0.255314	0.393904	0.156028	0.11026	0.26687		1.51004	1.07856	0.736322	1.21623	0.547927	0.723594	1.2796	0.892674	0.881876	0.932431	1.02292	1.09547
	41.59	0.0922216	0.306082	0.371906	-0.0023689	0.203219	-0.0840424	0.153298	0.17508	0.0353096	0.554486	0.119059	0.0649603	0.376928	0.18823	0.0955196	-0.035081	-0.120613	0.537546	0.195745	0.0284897	0.0665401	0.0697103	0.200234	0.171564	0.333145	0.36092	0.23895	0.16166	0.0874508	0.301747	0.21893	0.469409	0.149207	0.0892061	0.284938		1.37804	1.1472	0.826568	1.09269	0.608428	0.70887	1.35129	0.614468	0.958134	1.08472	0.81214	1.11579
	42.13	0.114759	0.225651	0.359461	-0.037886	0.181152	-0.0110126	0.183013	0.207623	-0.0106629	0.483671	0.085884	0.105104	0.253544	0.174941	0.0695584	0.0198277	-0.0558547	0.561127	0.178106	0.0765466	0.106607	0.145582	0.164918	0.196192	0.32162	0.412949	0.224091	-0.0003061	0.0723247	0.292255	0.238345	0.404375	0.114995	0.109028	0.144108		0.616698	1.03963	0.755728	1.08543	0.499417	0.667306	1.36707	0.829055	0.901514	0.857189	0.959122	1.04702
	42.66	0.0550513	0.255753	0.310445	0.0263167	0.227333	-0.0166186	0.217309	0.205944	0.0173054	0.461428	0.14207	0.147182	0.300038	0.193832	0.0878252	0.0048762	-0.0525079	0.531537	0.193504	0.177213	0.0982382	0.105903	0.219979	0.173744	0.314724	0.351175	0.0824503	0.0974833	0.0883771	0.283106	0.195949	0.218679	0.0877192	0.109602	0.211389		0.805243	0.878458	0.848495	1.02139	0.494072	0.690125	1.27055	0.717303	0.827792	0.943221	1.0333	1.0911
	43.19	0.105161	0.11081	0.330324	-0.0225375	0.178934	0.112607	0.18348	0.0565648	0.0065657	0.573124	0.173702	0.122038	0.26747	0.178623	0.063045	0.0208824	-0.0594833	0.454392	0.190795	-0.0071322	0.11653	0.132451	0.187802	0.216312	0.426577	0.408661	0.0954925	0.0826912	0.0748465	0.317444	0.24998	0.316922	0.168976	0.110688	0.23898		0.829044	1.03237	0.742881	1.08002	0.419969	0.666214	1.40453	0.476388	0.839784	0.978641	0.962623	0.983804
	43.73	0.0636589	0.19591	0.384416	-0.0815484	0.160066	-0.0700095	0.169468	0.129857	-0.0319908	0.354583	0.186589	0.130614	0.325807	0.163035	0.0843007	-0.0003856	-0.0837406	0.548498	0.200131	0.0127666	0.117956	0.125621	0.277638	0.18759	0.272828	0.402131	0.0962915	0.0563304	0.107727	0.341384	0.233511	0.316401	0.0922921	0.10158	0.500937		1.76938	1.10628	0.636092	1.10038	0.534481	0.649078	1.403	1.1405	0.863064	0.805695	0.988679	1.05338
	44.26	0.139872	0.243568	0.433817	-0.14708	0.160507	-0.0350519	0.143503	0.142166	-0.0055836	0.59247	0.0863845	0.0879524	0.29618	0.164187	0.0981258	-0.0802475	-0.263611	0.546928	0.204108	0.0452046	0.0800788	0.100683	0.235472	0.199044	0.28965	0.391121	0.16396	0.0482532	0.186897	0.274027	0.232433	0.154286	0.0929351	0.101994	0.390088		1.22145	1.01379	0.565598	0.896973	0.467861	0.717321	1.27909	0.694638	0.92449	1.04744	1.04385	0.936145
	44.79	0.134779	0.190537	0.436501	0.0064534	0.205289	-0.0191683	0.131476	0.0739603	-0.0874261	0.302789	0.160431	0.0714471	0.338149	0.144575	0.0748345	-0.0255893	-0.202619	0.612328	0.193438	0.0933305	0.0222563	0.137897	0.215344	0.156987	0.220002	0.386167	0.146532	0.185019	0.104411	0.344236	0.243399	0.443431	0.0929959	0.105841	0.63953		1.01409	0.928455	0.673219	1.07336	0.441343	0.653611	1.39821	0.870956	0.763851	0.865189	1.05281	0.963542
	45.32	0.0983814	0.0954656	0.363236	-0.196363	0.205641	-0.041273	0.222468	0.063032	0.003336	0.416588	0.181731	0.109423	0.281219	0.212026	0.0717058	0.0238984	-0.083832	0.553025	0.187481	0.0756904	0.0720501	0.122208	0.24482	0.265653	0.39417	0.413945	0.138368	0.0974756	0.0853748	0.320728	0.246949	0.141737	0.135216	0.0965552	0.692529		0.825699	0.973774	0.645174	1.13135	0.640057	0.623219	1.3902	1.03465	0.885916	0.809085	0.982465	0.953696
	45.86	0.0982871	0.336609	0.421297	0.0235959	0.130226	0.0109623	0.123389	0.0811027	-0.0113383	0.416234	0.133811	0.102793	0.273855	0.154702	0.0849525	0.006504	-0.234335	0.5608	0.20782	-0.0207312	0.145582	0.149727	0.26129	0.215793	0.326227	0.414483	0.0552243	0.116963	0.102874	0.359391	0.228487	0.493152	0.156228	0.107261	0.325313		0.678887	0.998669	0.734135	1.11675	0.519971	0.63049	1.21557	0.722887	0.911833	1.11957	0.952119	0.900771
	46.39	0.17852	0.196417	0.456464	0.006091	0.137959	0.0153719	0.145711	0.0525758	-0.0530409	0.480374	0.135274	0.0758096	0.277038	0.164661	0.0771666	-0.0188138	-0.218391	0.514224	0.230076	0.0087836	0.118311	0.0656813	0.197631	0.182106	0.42547	0.363978	0.237342	0.0554748	0.109154	0.312996	0.224982	0.433538	0.0912269	0.112069	0.401781		0.707874	1.14417	0.63864	1.10155	0.565809	0.610495	1.2799	0.623044	0.837572	0.876984	0.955824	1.07073
	46.92	0.0544221	0.398475	0.451697	-0.203295	0.167224	-0.0144082	0.109503	0.0538941	-0.0217563	0.318364	0.191881	0.115596	0.412849	0.183455	0.101306	0.090532	-0.221183	0.516801	0.189887	0.0363189	0.0549871	0.0858173	0.199218	0.165814	0.297283	0.384107	0.173419	0.101407	0.10992	0.366292	0.226028	0.352404	0.147856	0.112046	0.793779		0.768318	1.16803	0.829072	1.0751	0.489815	0.665412	1.28028	0.47637	0.958792	0.995352	1.05741	1.05019
	47.46	0.15195	0.274833	0.397689	-0.0436826	0.166536	-0.0555761	0.155637	0.083062	0.111241	0.382663	0.22035	0.112079	0.298215	0.185927	0.0743857	0.0226453	-0.322631	0.575757	0.189505	0.0332169	0.169915	0.142184	0.259005	0.153553	0.355557	0.393991	0.154643	0.0455449	0.0743264	0.329796	0.223393	0.235293	0.0882909	0.102957	0.498028		0.515707	0.984587	0.754908	1.05021	0.398508	0.69737	1.35077	0.711326	0.895333	0.765816	1.22053	1.0552
	47.99	0.18923	0.246827	0.432221	0.007496	0.167607	-0.0676649	0.114387	0.0340083	-0.025779	0.34451	0.207458	0.133929	0.249223	0.161773	0.113855	0.0402365	-0.279752	0.538952	0.187934	0.0530619	0.114477	0.0879544	0.286824	0.206741	0.285777	0.40715	0.114415	0.109464	0.140976	0.351245	0.225658	0.20592	0.131627	0.104051	0.441325		0.875779	1.30358	0.682743	0.98404	0.515521	0.624327	1.39084	0.897558	0.875801	0.809567	0.946513	0.932433
	48.52	0.309734	0.192218	0.424448	0.098326	0.206867	-0.0939748	0.131516	0.122224	-0.0041121	0.382269	0.158311	0.105665	0.277039	0.128978	0.112523	0.0453778	-0.181509	0.478365	0.213806	0.079841	0.0623111	0.121481	0.213543	0.184084	0.363012	0.420888	0.0773047	0.108472	0.0725365	0.363495	0.231032	0.442183	0.0423375	0.117139	0.649047		0.662552	1.13935	0.57605	0.972124	0.483147	0.616924	1.18904	1.03122	0.80301	0.720712	1.09187	0.956499
	49.06	0.141272	0.323506	0.417138	-0.127026	0.204983	-0.011209	0.10739	0.0517121	0.0045994	0.522281	0.16107	0.140051	0.273218	0.161993	0.109003	0.0105087	-0.119145	0.59152	0.205776	0.0651001	0.175772	0.119933	0.163969	0.193066	0.397823	0.38831	0.194754	0.0550309	0.144699	0.384567	0.24663	0.370449	0.0985732	0.126265	0.536359		1.1532	1.14509	0.699935	1.0297	0.629172	0.622846	1.26595	0.672041	1.13646	1.23899	1.00781	1.03093
	49.59	0.155118	0.244521	0.382201	-0.137835	0.187137	-0.0105729	0.121704	0.0085935	0.0778176	0.417037	0.236828	0.0662832	0.269529	0.172136	0.1121	0.0568849	-0.296844	0.493089	0.198748	-0.0107514	0.112154	0.130786	0.244845	0.159018	0.202492	0.462446	0.113809	0.0834611	0.0941874	0.361741	0.206075	0.491715	0.132679	0.105925	0.404943		0.577525	1.18133	0.754709	1.0056	0.444066	0.65594	1.30828	0.970152	1.07143	1.10634	1.04568	1.02668
	50.12	0.245695	0.366117	0.433368	-0.149542	0.232186	-0.0430489	0.0730517	0.0377584	-0.034201	0.468336	0.168203	0.0960332	0.311016	0.135848	0.11184	0.0105722	-0.242341	0.532876	0.236381	0.0418872	0.125295	0.0872215	0.315003	0.184462	0.505714	0.437864	0.129502	0.0197817	0.085517	0.332051	0.230713	0.377936	0.135953	0.106555	0.488299		0.839182	1.23822	0.80727	1.08461	0.522372	0.68532	1.18644	1.07856	0.919346	0.843125	1.00504	0.936646
	50.66	0.136335	0.54294	0.40389	-0.0875698	0.19587	-0.0780849	0.0078294	0.108312	0.0633726	0.403358	0.274245	0.114783	0.302731	0.11334	0.113595	0.0550754	-0.226961	0.593533	0.208972	0.0776618	0.161146	0.0413684	0.232099	0.219814	0.30674	0.440935	0.19861	0.0615385	0.0805483	0.348431	0.211903	0.319988	0.0384166	0.0994691	0.357497		1.04263	1.28737	0.93086	1.01699	0.529782	0.62232	1.33916	1.07314	0.88128	1.19798	1.07534	1.02689
	51.19	0.101858	0.277729	0.418698	-0.0509377	0.174814	-0.0303311	0.0873023	0.0491107	0.0076624	0.428468	0.196376	0.0961113	0.223076	0.15389	0.0804118	-0.0046045	-0.185696	0.594276	0.219292	0.0152706	0.163092	0.1167	0.257857	0.164527	0.318196	0.443722	0.153295	0.0669542	0.167429	0.327726	0.228675	0.354348	0.0761479	0.120723	0.398048		1.31248	1.24798	0.698979	1.07641	0.579562	0.631624	1.31866	0.771316	1.03415	1.15695	1.16702	0.950613
	51.72	0.14478	0.349844	0.405052	0.161883	0.174536	0.0545508	0.0850153	0.0342228	0.0799607	0.391219	0.269209	0.126556	0.236246	0.164412	0.0788371	-0.0229059	-0.188927	0.582155	0.211121	-0.0285373	0.144484	0.106201	0.264766	0.187365	0.471307	0.392329	0.0980804	0.108828	0.136035	0.331414	0.218369	0.407031	0.148034	0.0856755	0.47297		0.666984	1.31204	0.885947	0.963771	0.559084	0.600829	1.21616	0.665053	1.05232	1.02338	1.00084	0.93122
	52.26	0.123569	0.17894	0.395968	0.103804	0.275962	-0.0109191	0.033404	0.070218	0.0013009	0.417866	0.22599	0.125301	0.323414	0.143672	0.106158	-0.070585	-0.234236	0.58765	0.21328	0.0752917	0.140127	0.0941571	0.282673	0.222049	0.326454	0.407071	0.248158	0.0314749	0.0949022	0.254659	0.203365	0.196848	0.0804595	0.0983225	0.479824		0.904124	1.26899	0.639787	1.03668	0.625404	0.616253	1.25479	0.696187	1.02056	1.17158	1.03851	0.900666
	52.79	0.0817483	0.351359	0.494368	0.165435	0.226345	0.0974464	0.106454	0.0915739	0.0741405	0.4351	0.201697	0.0577539	0.317111	0.149367	0.0972338	-0.0357767	-0.202637	0.566723	0.221804	0.143844	0.135135	0.0916291	0.228875	0.167356	0.558733	0.522448	0.225402	0.0073032	0.136571	0.352035	0.237819	0.496898	0.133063	0.121411	0.434347		0.613812	1.27707	0.755223	1.0914	0.65961	0.580589	1.28206	0.782946	1.1545	0.839457	1.14452	0.893645
	53.32	0.150476	0.0964684	0.429217	0.0551062	0.217838	0.0050548	0.108897	0.0719341	-0.0310277	0.365844	0.186759	0.11062	0.370567	0.167011	0.0923999	0.0064261	-0.385787	0.52064	0.200065	0.0458629	0.0803409	0.148421	0.208157	0.148477	0.408548	0.428726	0.182218	-0.0144507	0.125606	0.31409	0.240666	0.378464	0.103686	0.114389	0.18772		1.0753	1.37045	0.809	1.09839	0.552009	0.635575	1.43214	0.990691	1.05431	1.3597	1.1403	0.953435
	53.86	0.145231	0.346165	0.32628	0.0648112	0.225902	-0.0061147	0.111931	0.0646019	0.0078012	0.412493	0.290029	0.0878077	0.295058	0.173935	0.0948665	-0.0617903	-0.293	0.57882	0.231911	-0.0105471	0.189606	0.114385	0.23573	0.195343	0.321877	0.374302	0.218018	-0.0011831	0.148889	0.3325	0.22752	0.434506	0.130482	0.100121	0.66331		0.863369	1.34594	0.854535	0.963186	0.468264	0.600352	1.25574	0.811292	1.18239	0.962598	0.998436	0.965257
	54.39	0.147675	0.294831	0.479132	0.202762	0.228025	-0.0202406	0.0382404	0.0236789	0.0412631	0.448545	0.188824	0.0514465	0.41744	0.187634	0.0854954	-0.0434342	-0.322778	0.588379	0.22921	0.111661	0.160146	0.0665314	0.200189	0.202361	0.389245	0.424347	0.189631	0.0446444	0.177225	0.406025	0.256254	0.321831	0.124149	0.108966	0.548153		1.06822	1.06095	0.686752	0.98051	0.610175	0.588843	1.21281	1.11663	1.25966	0.9328	1.05754	0.903687
	54.92	0.144436	0.306498	0.455798	0.136315	0.240749	0.0123705	0.122879	0.0520276	-0.0395132	0.428185	0.281471	0.0776765	0.303138	0.16544	0.0940208	-0.0409906	-0.135739	0.527469	0.220391	0.0257392	0.123407	0.126971	0.251257	0.119234	0.220933	0.417774	0.257949	0.0335285	0.16856	0.359271	0.229583	0.342252	0.0971444	0.130902	0.333508		0.900111	1.17601	0.676825	1.01123	0.816948	0.588723	1.39144	0.704124	1.14044	1.27758	1.08058	0.930003
	55.46	0.165281	0.135634	0.508589	0.191412	0.259507	-0.0109298	0.09662	0.0774249	-0.0424467	0.385611	0.197093	0.140776	0.305006	0.150521	0.0921937	0.030531	-0.309026	0.613463	0.223454	0.0603033	0.135664	0.139193	0.278237	0.156608	0.262325	0.390078	0.278237	-0.0612308	0.183877	0.370557	0.208976	0.311637	0.170264	0.114773	0.452003		0.960766	1.44849	0.697737	0.889553	0.406483	0.615492	1.32259	0.759207	1.14094	1.01346	1.01792	0.931724
	55.99	0.171675	0.291717	0.540828	0.26375	0.214696	-0.0281917	0.0621117	0.0273117	0.0869055	0.425785	0.262676	0.0756816	0.43838	0.202107	0.0988844	-0.0431016	-0.331471	0.566312	0.248198	0.018441	0.0710287	0.0630521	0.299841	0.172061	0.256166	0.3981	0.151184	0.044238	0.09009	0.313638	0.217322	0.315097	0.0768444	0.0834279	0.417039		0.913387	1.39084	0.763807	1.01847	0.532778	0.625871	1.29901	1.142	1.10416	1.12398	1.1198	0.961507
	56.52	0.22901	0.322045	0.542164	0.281954	0.191549	0.0003886	0.0244818	0.15945	0.0634362	0.358636	0.283509	0.0593449	0.314988	0.153525	0.0880575	-0.0188111	-0.236641	0.506251	0.240983	-0.0287845	0.188404	0.115182	0.189973	0.173157	0.218248	0.354121	0.100736	0.0300761	0.11683	0.379259	0.193571	0.481394	0.159474	0.0915372	0.486581		1.11609	1.46208	0.662712	0.994988	0.642756	0.674706	1.38154	1.2367	1.11458	0.935855	1.02362	0.846632
	57.06	0.188226	0.24179	0.49293	0.250763	0.236376	-0.0177957	-0.00621	0.151621	0.0633262	0.420177	0.232924	0.0912065	0.396709	0.170949	0.0754847	0.0194712	-0.196151	0.465065	0.220275	0.0423202	0.14511	0.0961655	0.20788	0.149609	0.237613	0.357041	0.195405	0.0857323	0.136338	0.436959	0.215856	0.454407	0.0574772	0.123797	0.565351		0.686965	1.46708	0.782406	1.08468	0.677176	0.644694	1.31055	0.648242	1.14525	1.44027	1.03757	0.854328
	57.59	0.156933	0.199726	0.488967	0.255117	0.271305	0.0096351	0.0218824	0.0789897	-0.0054758	0.419996	0.251429	0.138307	0.423536	0.183682	0.0715941	-0.0149082	-0.341526	0.572188	0.212693	-0.0048929	0.170349	0.158294	0.249643	0.154078	0.324206	0.374257	0.160616	-0.0301806	0.154745	0.450526	0.21677	0.308788	0.109406	0.111854	0.429534		1.02184	1.49368	0.651457	1.0283	0.528402	0.6105	1.32624	0.828851	1.15138	1.24276	1.08194	0.965132
	58.12	0.156669	0.221117	0.453746	0.412114	0.275534	-0.0640906	0.006509	0.0982183	0.142865	0.446255	0.302139	0.122186	0.4468	0.162172	0.0908552	-0.0120909	-0.187688	0.474725	0.253803	0.151416	0.166845	0.149379	0.260792	0.166972	0.282994	0.440279	0.224352	0.0258547	0.0991961	0.385443	0.241019	0.366068	0.0998433	0.11138	0.523671		0.9831	1.39423	0.758983	1.06222	0.596334	0.602504	1.29146	1.40775	1.0537	0.84123	1.08413	0.842727
	58.66	0.13587	0.225598	0.446546	0.447414	0.195733	0.0647078	-0.0525877	0.0214121	0.0595272	0.491109	0.319464	0.11528	0.270421	0.188052	0.132496	-0.0432086	-0.339896	0.382295	0.235742	0.0495843	0.133459	0.105741	0.214973	0.134978	0.398442	0.314955	0.225231	0.0272916	0.136697	0.321004	0.216929	0.322501	0.172549	0.121523	0.737782		1.01051	1.56181	0.835439	0.972459	0.506663	0.643507	1.28981	1.62709	1.16267	0.890128	1.02251	0.850478
	59.19	0.235347	0.344338	0.523884	0.111141	0.25018	-0.0071123	0.0332223	0.0142933	0.0500496	0.448103	0.229741	0.0738231	0.362044	0.170743	0.0772144	0.0891785	-0.366849	0.463142	0.239196	0.0954604	0.0853637	0.114796	0.243066	0.160224	0.31331	0.396215	0.168948	-0.0420242	0.124748	0.469871	0.216541	0.317132	0.138249	0.125066	0.607777		1.0612	1.42805	0.795657	0.966522	0.586826	0.674046	1.42152	0.637427	1.09445	1.25918	1.04284	0.938743
	59.72	0.164575	0.217085	0.542912	0.282493	0.221654	0.008818	-0.0458115	0.0837093	0.0849576	0.430237	0.254794	0.105083	0.294681	0.207618	0.069538	0.0222676	-0.520284	0.488309	0.220601	-0.0076477	0.0741201	0.173149	0.228169	0.173998	0.319698	0.368383	0.179237	-0.0065243	0.126244	0.453816	0.167469	0.21553	0.137895	0.110259	0.469418		0.987429	1.41097	0.742688	1.04348	0.690447	0.692769	1.21277	0.727975	1.27866	1.14793	1.11061	0.858865
	60.26	0.262703	0.182346	0.458639	0.231977	0.244482	0.019858	0.0268491	0.0436281	0.0974184	0.542442	0.295953	0.100294	0.2885	0.194739	0.112144	-0.0365525	-0.320607	0.412874	0.242032	-0.0645573	0.0879244	0.131464	0.319474	0.134263	0.400711	0.386107	0.136669	-0.0371929	0.169247	0.547372	0.217367	0.0840006	0.0726132	0.12761	0.272407		0.652658	1.37048	0.701841	1.00596	0.547099	0.715293	1.46116	0.747084	1.22022	1.35658	0.966768	0.894646
	60.79	0.236422	0.33644	0.563549	0.135865	0.221733	-0.070841	-0.0762418	0.138615	0.152003	0.478738	0.26997	0.108927	0.361506	0.187166	0.124092	-0.0582315	-0.408367	0.438498	0.264424	0.046169	0.0333973	0.105834	0.197198	0.164223	0.381212	0.369242	0.272972	-0.0090287	0.121083	0.372151	0.198032	0.4012	0.110599	0.129408	0.602037		1.28216	1.55774	0.866681	1.00701	0.799653	0.715012	1.43654	1.22797	1.13912	1.09831	1.14705	0.851988
	61.32	0.159282	0.267279	0.592032	0.212491	0.213334	-0.0714259	-0.0564011	0.099352	0.181546	0.507588	0.322489	0.163467	0.346323	0.134361	0.0787195	0.0090642	-0.421113	0.443547	0.257677	-0.0560196	0.10426	0.115203	0.270511	0.1286	0.329965	0.34651	0.264402	0.0402546	0.102594	0.48902	0.193546	0.173709	0.134953	0.131879	0.677805		0.938057	1.32503	0.861966	1.01735	0.657106	0.641005	1.25261	0.982864	1.14324	1.2558	1.14268	0.834437
	61.86	0.273081	0.192208	0.513285	0.226272	0.18444	0.0562072	-0.0229	0.0195807	0.132842	0.461127	0.282139	0.198541	0.347408	0.199424	0.111824	-0.0823943	-0.342686	0.407206	0.256166	-0.0128174	0.223819	0.1249	0.211635	0.150244	0.346347	0.330783	0.139029	-0.0243793	0.153131	0.383867	0.206039	0.233586	0.152159	0.122848	0.579776		1.01234	1.4087	0.926037	0.963446	0.727604	0.688953	1.28726	1.04948	1.30237	1.24754	1.04071	0.895637
	62.39	0.245063	0.330305	0.495904	0.177158	0.2186	-0.0527437	-0.031969	0.119974	0.0582266	0.459541	0.233323	0.170026	0.45237	0.187783	0.118241	-0.0338834	-0.384941	0.49493	0.282666	-0.0496507	0.156936	0.198497	0.280043	0.188547	0.32015	0.319361	0.201773	-0.0183857	0.176276	0.494754	0.221946	0.41736	0.132526	0.100149	0.425556		0.692126	1.4028	0.734649	1.04953	0.455302	0.706959	1.32771	1.74219	1.12846	1.0594	1.07771	0.92236
	62.92	0.276901	0.306108	0.517768	0.0933688	0.229836	-0.0468497	-0.0151767	0.176402	0.100569	0.507215	0.259658	0.146512	0.37098	0.178856	0.0940305	0.0424258	-0.314513	0.427626	0.264847	-0.0696933	0.149607	0.113189	0.241953	0.134469	0.404623	0.292764	0.210797	0.0061669	0.129006	0.433648	0.176533	0.404604	0.177274	0.13763	0.481819		0.639443	1.47077	0.772503	1.07852	0.510748	0.637862	1.29583	1.13959	1.15341	1.15718	1.07765	0.832068
	63.46	0.241157	0.208194	0.688547	0.255501	0.22762	-0.0322863	0.0208583	0.134827	0.206705	0.487018	0.258281	0.144657	0.403718	0.200715	0.105846	-0.0630778	-0.440447	0.39119	0.271033	-0.0616572	0.116013	0.138881	0.176032	0.109116	0.45851	0.331587	0.232019	0.0659928	0.128844	0.462515	0.174924	0.216917	0.0452057	0.114032	0.277699		0.87137	1.44558	0.773873	1.04586	0.470388	0.626104	1.3235	1.10055	1.05296	1.31614	1.13612	0.907491
	63.99	0.224589	0.433574	0.560737	0.293357	0.188366	0.0001869	-0.0508451	0.135639	0.10979	0.496951	0.29175	0.104866	0.439574	0.189529	0.0912639	0.045791	-0.408851	0.412709	0.28365	0.0107112	0.189433	0.189013	0.286103	0.16712	0.301099	0.325636	0.173825	-0.0831457	0.113042	0.391311	0.181149	0.213847	0.146037	0.0889188	0.750172		0.693864	1.43552	0.856472	1.01807	0.605792	0.750254	1.26657	0.845258	1.13992	1.09566	1.14794	0.859564
	64.52	0.246714	0.307401	0.516126	0.214286	0.268294	0.0300873	-0.0835908	0.175966	0.0611377	0.444922	0.411014	0.12279	0.562054	0.219598	0.100194	-0.0320869	-0.338999	0.391233	0.284064	-0.116099	0.104288	0.154186	0.197098	0.220774	0.379213	0.330675	0.258097	-0.0830748	0.14887	0.615919	0.169094	0.464426	0.15045	0.107668	0.457197		1.07132	1.54865	0.769592	0.921236	0.492189	0.658238	1.19205	0.498156	1.1688	1.13112	1.0228	0.849651
	65.06	0.216776	0.279766	0.554385	0.18314	0.264314	0.0299174	-0.103293	0.168681	-0.0219132	0.477045	0.282034	0.10787	0.425533	0.183727	0.11891	-0.0397621	-0.437879	0.373312	0.266297	0.035691	0.154384	0.125362	0.13372	0.120665	0.530502	0.339363	0.236303	-0.0323957	0.185906	0.492277	0.147684	0.240983	0.109557	0.12881	0.485737		0.798401	1.457	0.820148	1.00578	0.71283	0.666385	1.20329	0.584411	1.18661	1.02272	1.01186	0.901769
	65.59	0.288484	0.417733	0.575314	0.24731	0.248122	0.0827954	-0.0860213	0.204863	0.102841	0.442328	0.358144	0.119659	0.385009	0.170514	0.0992111	0.0475649	-0.328576	0.42542	0.25703	-0.106312	0.128003	0.0853843	0.186417	0.115161	0.379384	0.396513	0.230968	-0.0167386	0.101703	0.450708	0.164014	0.261211	0.103806	0.107433	0.587479		0.850323	1.60336	0.723039	0.955085	0.634923	0.695212	1.31546	1.49712	1.15995	1.17789	1.12339	0.853625
	66.12	0.139562	0.487956	0.61374	0.456004	0.211568	-0.0272876	-0.0774325	0.165434	0.125373	0.509429	0.317893	0.115389	0.301776	0.16851	0.090413	-0.0278772	-0.42965	0.443667	0.297313	-0.122632	0.157511	0.147323	0.215206	0.181128	0.454089	0.385116	0.289229	-0.0404505	0.157803	0.453094	0.189563	0.352774	0.0806902	0.0991486	0.482632		0.629364	1.42032	0.737245	1.00162	0.620825	0.695526	1.37278	0.845032	1.05766	1.00019	1.02255	0.813534
	66.65	0.181829	0.401853	0.554138	0.317136	0.24129	0.0838898	-0.090463	0.167968	0.136112	0.31799	0.387812	0.0785411	0.390028	0.249141	0.0747379	-0.0284024	-0.529623	0.389229	0.290156	-0.0822691	0.0940616	0.129214	0.175115	0.164595	0.621147	0.313277	0.19057	-0.0766619	0.130699	0.555116	0.211353	0.28964	0.0947508	0.107839	0.203647		0.715195	1.77204	0.894923	0.964421	0.501479	0.695617	1.22843	1.25519	1.22391	1.02054	1.12542	0.885764
	67.19	0.16395	0.31143	0.550381	0.446088	0.24667	0.0039505	-0.0388198	0.223593	0.199209	0.522292	0.387694	0.159525	0.49635	0.19001	0.103215	0.048965	-0.509474	0.389674	0.29726	0.0732599	0.0881707	0.12571	0.184881	0.142214	0.522977	0.315357	0.185249	-0.0574554	0.185449	0.416191	0.196478	0.277135	0.138033	0.114991	0.632317		0.783173	1.37488	0.722351	0.97891	0.690919	0.711612	1.37278	0.426232	1.18044	1.05397	1.01836	0.845397
	67.72	0.202141	0.481728	0.606845	0.280867	0.23074	0.0083545	-0.115926	0.273238	0.0875571	0.467362	0.343194	0.125625	0.450308	0.232342	0.114181	-0.0702278	-0.523676	0.46649	0.286201	-0.0637164	0.136762	0.168489	0.118946	0.112694	0.475442	0.407837	0.186322	-0.0024571	0.124209	0.411672	0.183145	0.240773	0.171826	0.0952774	0.489774		0.930056	1.92903	0.754985	1.0203	0.603323	0.717069	1.29194	1.30953	1.1123	0.864163	1.14972	0.83456
	68.25	0.226118	0.471215	0.606357	0.310191	0.248525	-0.013436	-0.030682	0.358704	0.179331	0.509276	0.305658	0.160952	0.285808	0.216403	0.122677	0.0039268	-0.533511	0.313989	0.315229	-0.132139	0.136995	0.149765	0.265522	0.153869	0.485077	0.330989	0.215465	0.0490328	0.13933	0.524493	0.196126	0.226868	0.16647	0.0891134	0.2201		0.923468	1.55531	0.781922	1.01686	0.675382	0.744573	1.45075	0.90828	1.20267	1.2135	1.13588	0.892343
	68.79	0.191983	0.343255	0.58882	0.447015	0.228968	0.0003231	-0.117297	0.272867	0.292075	0.6141	0.237744	0.161079	0.402963	0.192346	0.102304	0.0276211	-0.467157	0.396759	0.316122	-0.0951749	0.0735431	0.210193	0.185473	0.145687	0.524814	0.314378	0.216363	0.0374192	0.194454	0.430831	0.194334	0.25322	0.262086	0.105859	0.280855		0.971348	1.67515	0.748702	0.996736	0.760626	0.750919	1.25634	1.48193	1.11187	1.14963	1.19662	0.825126
	69.32	0.204816	0.332524	0.564565	0.406109	0.171498	-0.0054387	-0.0519016	0.269998	0.094738	0.311792	0.308425	0.123671	0.404931	0.220913	0.0991738	0.0788412	-0.449194	0.349348	0.321039	-0.0766113	0.191758	0.153942	0.126546	0.1064	0.598761	0.28187	0.277493	0.0079762	0.133871	0.438981	0.192066	0.273996	0.157095	0.120329	0.352464		1.15995	1.75055	0.713968	1.04636	0.724347	0.637987	1.17105	1.19613	1.15064	1.05251	1.26745	0.81832
	69.85	0.205907	0.611493	0.643962	0.340706	0.225143	-0.0768166	0.0338548	0.209141	0.0601594	0.379505	0.293462	0.119682	0.269834	0.175497	0.0789871	-0.0278643	-0.438653	0.420434	0.312247	-0.0777809	0.129598	0.214761	0.167691	0.115651	0.486407	0.307473	0.312219	-0.0040453	0.136596	0.474711	0.185502	0.472105	0.167702	0.0963896	0.315288		0.554996	1.62239	0.667427	1.04689	0.656994	0.809841	1.30479	1.23438	1.10004	1.36501	1.28123	0.843752
	70.39	0.188965	0.354275	0.512354	0.335804	0.247232	-0.0154999	0.040809	0.247072	0.109116	0.476224	0.303596	0.0877868	0.285062	0.212477	0.108572	-0.0011962	-0.505254	0.403966	0.332016	-0.033429	0.126353	0.171141	0.17619	0.151482	0.609773	0.297235	0.187429	0.0345317	0.148657	0.465914	0.212895	0.27756	0.0772143	0.089133	0.158938		0.69621	1.41634	0.645167	1.10134	0.795468	0.735854	1.30914	1.10912	1.11775	1.24291	1.19484	0.824748
	70.92	0.235213	0.437841	0.559832	0.448046	0.259424	0.0581572	-0.0322859	0.250587	0.0588364	0.509103	0.282383	0.127559	0.350642	0.207252	0.110831	-0.096774	-0.467094	0.391544	0.333485	-0.0907885	0.0892829	0.15286	0.228687	0.146142	0.414151	0.331502	0.203444	0.0136892	0.174381	0.399529	0.212897	0.11758	0.141601	0.107496	0.268122		0.76953	1.64203	0.738686	0.982572	0.732398	0.760377	1.38218	1.10424	1.18422	0.985248	1.08668	0.771716
	71.45	0.237231	0.467495	0.470966	0.5201	0.328141	-0.0501638	-0.0723903	0.366472	0.0762512	0.551609	0.233488	0.092986	0.27281	0.236107	0.0990135	-0.0439813	-0.440007	0.358941	0.320657	-0.0918198	0.182315	0.127363	0.131518	0.106769	0.506366	0.278192	0.273099	-0.0389686	0.15508	0.369019	0.196346	0.144445	0.109491	0.112675	0.216154		0.660815	1.49045	0.830728	1.0631	0.661472	0.832607	1.29809	1.07928	1.12756	1.14508	1.30464	0.909444
	71.99	0.215601	0.31561	0.611703	0.373994	0.326321	-0.07068	-0.0437039	0.360998	0.159003	0.546986	0.320399	0.0901924	0.297126	0.225464	0.113216	-0.0542523	-0.440162	0.382605	0.340161	-0.0117838	0.183444	0.124435	0.208531	0.11795	0.481834	0.329266	0.324184	-0.0138644	0.140157	0.411541	0.20938	0.224599	0.154924	0.103856	0.10746		1.05427	1.40256	0.644583	0.953682	0.56148	0.768635	1.28377	0.509656	1.07218	1.03852	1.26631	0.88816
	72.52	0.172886	0.44182	0.543148	0.25561	0.257983	-0.0221494	-0.0908465	0.386488	0.14572	0.586455	0.199691	0.140488	0.270566	0.255993	0.101961	-0.0628173	-0.521257	0.334715	0.344922	-0.0841782	0.200752	0.203773	0.262623	0.106002	0.482545	0.336346	0.222008	-0.0388119	0.140838	0.477732	0.201642	0.16288	0.216887	0.090083	0.162353		0.932471	1.63682	0.829503	0.932683	0.558727	0.802389	1.21035	1.0702	1.14699	1.0407	1.33173	0.900097
	73.05	0.213726	0.342843	0.559477	0.250821	0.295445	0.0017627	-0.151027	0.414339	0.0930028	0.61927	0.277136	0.106188	0.312659	0.193701	0.120746	-0.099751	-0.576493	0.365712	0.356882	-0.106108	0.196714	0.131609	0.16165	0.117066	0.658905	0.315553	0.261136	-0.0789373	0.193275	0.401445	0.201047	0.17498	0.222233	0.10792	0.306216		1.03578	1.57918	0.867427	0.968789	0.704794	0.717473	1.21714	0.780395	1.06827	1.26414	1.38003	0.888433
	73.59	0.222921	0.495884	0.579776	0.237228	0.272973	-0.0508205	0.0354549	0.363751	0.130498	0.576131	0.189454	0.0978554	0.193535	0.229047	0.11025	-0.0802551	-0.541257	0.422323	0.349403	-0.0367627	0.284842	0.133255	0.175954	0.108761	0.759354	0.288515	0.210104	0.0019451	0.20654	0.47681	0.210485	0.395569	0.113919	0.103108	0.13196		1.09824	1.59809	0.8814	0.924892	0.525383	0.786934	1.35854	1.0031	1.19155	1.0437	1.23521	0.825518
	74.12	0.190349	0.46193	0.48365	0.37373	0.311279	0.0024074	-0.0846277	0.466522	0.160491	0.473021	0.275025	0.103618	0.187129	0.279488	0.0781881	-0.0353439	-0.611698	0.306987	0.377078	-0.0816038	0.137396	0.0935414	0.146683	0.169163	0.642919	0.28777	0.234032	0.0081543	0.150515	0.429791	0.200424	0.161706	0.158113	0.114017	0.197127		0.715355	1.60034	0.70094	1.11186	0.724286	0.840465	1.33306	0.802284	1.04606	0.93194	1.22853	0.770786
	74.65	0.177608	0.256835	0.412342	0.468292	0.302842	-0.070371	-0.0932331	0.428392	-0.0407609	0.474154	0.205487	0.117526	0.202013	0.265041	0.112729	-0.071598	-0.508278	0.393059	0.349064	-0.112501	0.14123	0.137586	0.228991	0.149041	0.405906	0.300268	0.252726	-0.007108	0.231495	0.429429	0.235141	0.147008	0.200648	0.0971856	0.462628		1.05966	1.31223	0.826753	1.14524	0.57572	0.785133	1.23842	1.13033	1.12228	0.985917	1.12204	0.841936
[truncated: 26 more columns]
