# Supplementary material for: Integrin-based diffusion barrier separates membrane domains enabling the formation of microbiostatic frustrated phagosomes
Source: eLife. 2018 Mar 19;7:e34798. doi: 10.7554/eLife.34798 (PMC5897098; doi:10.7554/eLife.34798)
Supplement: Figure 9—source data 1. [file elife-34798-fig9-data1.xlsx]

## Sheet: Sheet1
Figure 9C		PLCd-PH
		fluorescence ratio (hyphal cup: plasma membrane)
		untreated	LatA
		13.41	1.05
		10.79	1.31
		24.21	4.38
		2.4	1.52
		1.83	1.29
		2.64	1.68
		8.27	1.13
		4.21	1.06
		4.23	0.99
		2.59	1.46
		3.76	0.63
		5.17	2.65
		6.47	1.08
		4.93	1.13
		3.3	5.39
		9.26	0.65
		3.47	0.73
		5.16	0.85
		8.58	1.01
		22.64	0.81
		7.89	1.06
		7.42	0.42
		6.65	1.46
		11.83	0.55
		3.53	0.6
		7.15	1
		2.26	0.97
		2.92	0.98
		13.43	0.69
		13.92	1.28
