# Supplementary material for: Integrin-based diffusion barrier separates membrane domains enabling the formation of microbiostatic frustrated phagosomes
Source: eLife. 2018 Mar 19;7:e34798. doi: 10.7554/eLife.34798 (PMC5897098; doi:10.7554/eLife.34798)
Supplement: Figure 10—source data 1. [file elife-34798-fig10-data1.xlsx]

## Sheet: Sheet1
Figure 10F			internalized				actin cuff				extracelluar
		Time (min)	MEAN	SEM	N		MEAN	SEM	N		MEAN	SEM	N
		0	8.911	0.7692	15		9.792	0.58	24		9.505	0.2872	133
		10	11.21	0.4087	57		11.48	0.3779	88		11.61	0.5556	54
		20	12.47	0.3487	98		12.93	0.4429	69		15.23	0.6374	54
		30	13.51	0.4164	92		14.22	0.4108	94		16.49	0.6767	54
		40	14.18	0.4052	74		14.84	0.468	87		17.36	0.6137	54
		50	15.06	0.4234	87		15.81	0.5545	87		19.62	0.6889	47
		60	15.83	0.3814	114		16.74	0.4483	107		21.87	0.7058	42
